# Supplementary material
Source: PubMed Central journal article supplement (PMC2518744)
Supplement: NIHMS62423-supplement-File0021.pdf [file NIHMS62423-supplement-File0021.pdf]

## Supporting information for

# **B-C Bond Cleavage by a Low-Coordinate Iron Hydride Complex and N-N Bond Cleavage by the Hydridoborate Product**

Ying Yu, William W. Brennessel, Patrick L. Holland\*

|                                                                       |      |
|-----------------------------------------------------------------------|------|
| NMR spectra                                                           | S-2  |
| Kinetic experiments                                                   | S-3  |
| NMR titration of H <sub>2</sub> NNH <sub>2</sub> binding              | S-7  |
| GC detection of H <sub>2</sub>                                        | S-8  |
| IR spectra of complexes <b>3</b> and <b>4</b>                         | S-11 |
| CSD search of M-H-B metrical parameters                               | S-13 |
| CSD search of Fe-(N <sub>2</sub> H <sub>4</sub> ) metrical parameters | S-14 |
| X-ray crystallography data                                            | S-15 |

NMR for the reaction of  $[L^{Me}FeH]_2 + BEt_3 \rightarrow L^{Me}Fe(\mu-H)_2BEt_2 + L^{Me}FeEt$

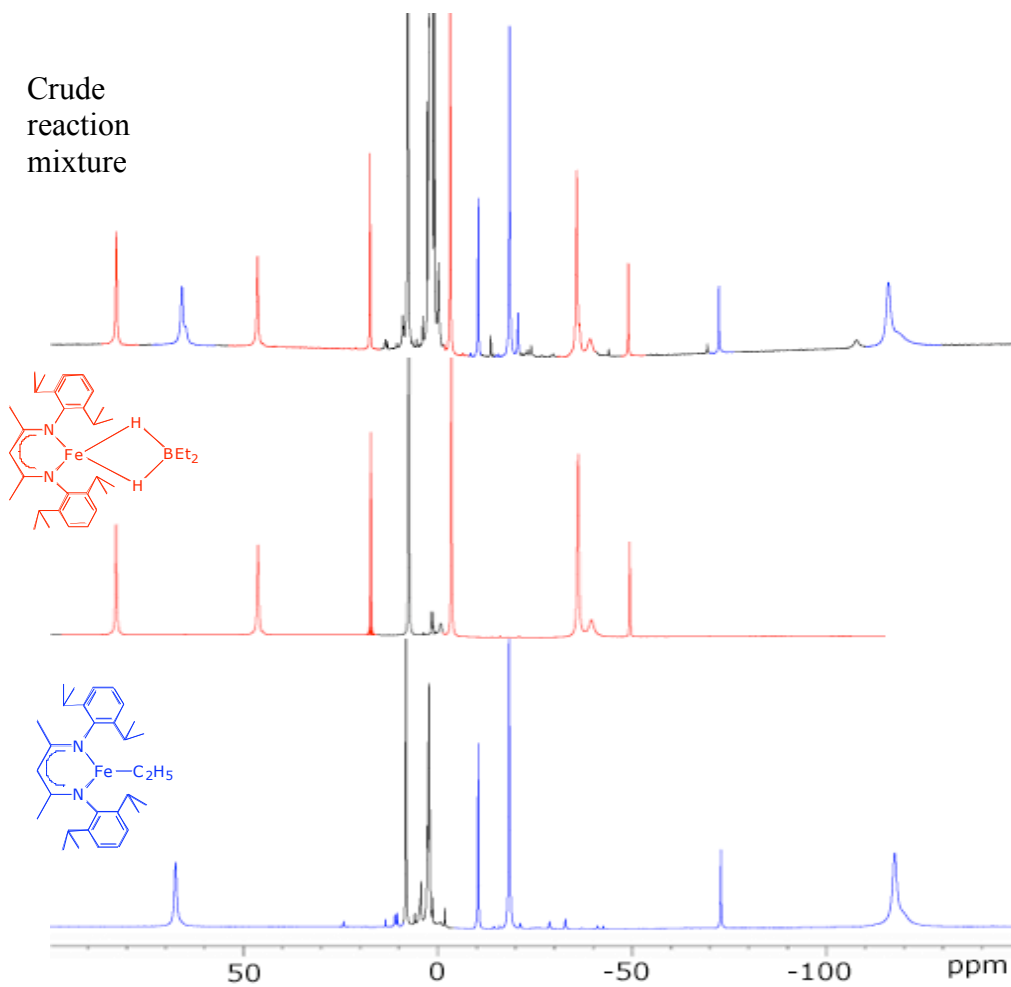

The ratio between  $L^{Me}Fe(\mu-H)_2BEt_2$  and  $L^{Me}FeEt$  is 1 : 1 based on NMR integration of the reaction mixture.

## Kinetic Experiments

**1. BEt<sub>3</sub> effect.** Figure SI-1 shows a typical time course for the disappearance of L<sup>Me</sup>Fe(μ-H)<sub>2</sub>FeL<sup>Me</sup> in the presence of excess BEt<sub>3</sub>. The plot of ln[**1a**] vs. time confirms the first-order dependence on [Fe]. Attempted fits to 1/[**1a**] (2nd order) or [**1a**]<sup>1/2</sup> (half-order) were markedly curved.

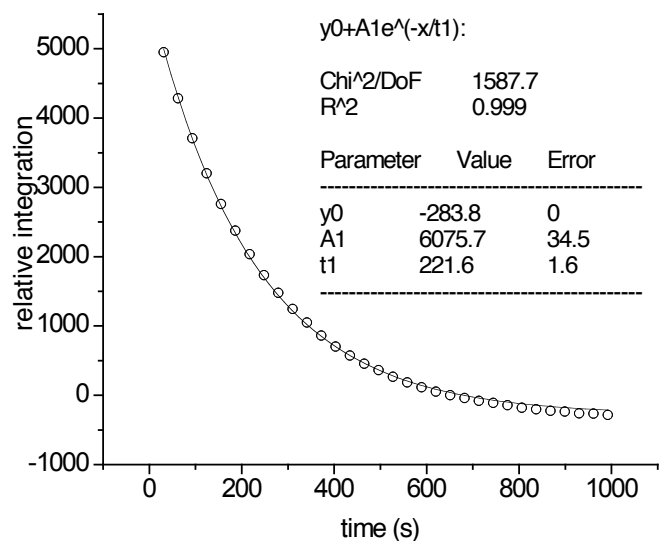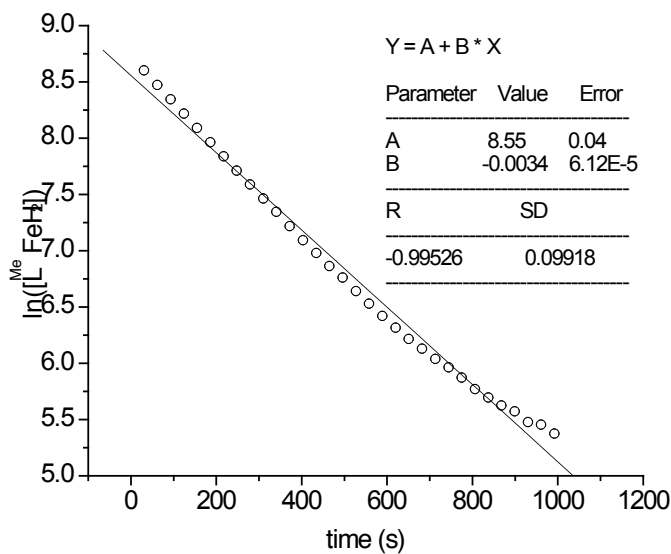

Figure SI-1. (a) Top: The disappearance of **1a** at 313.8 K. (b) Bottom: plot of ln[**1a**] vs. time using the same data.

2. [ $L^{Me}Fe(\mu-H)_2FeL^{Me}$ ] effect. Without  $Hg^0$ , we observed a slightly decreased  $k_{obs}$  with increasing [1a].

Table SI.1. Observed rate constant vs. [1a] without  $Hg^0$

| 1a / mg | [1a]    | $k_{obs} / s^{-1}$                 |
|---------|---------|------------------------------------|
| 4.8 mg  | 11.1 mM | $k_{obs} = 3.97(7) \times 10^{-3}$ |
| 8.0 mg  | 21.1 mM | $k_{obs} = 3.33(1) \times 10^{-3}$ |
| 12.6 mg | 31.5 mM | $k_{obs} = 2.79(4) \times 10^{-3}$ |
| 16.9 mg | 42.3 mM | $k_{obs} = 2.51(2) \times 10^{-3}$ |

However, when a drop of  $Hg^0$  is used,  $k_{obs}$  remains constant within  $20 \text{ mM} < [1] < 40 \text{ mM}$  (see table in paper).

### 3. Rate constants from following the concentration of different compounds

Table SI.2. Observed rate constants from integration of different compounds

| [1a]                  | [BEt <sub>3</sub> ] | $k_{obs} / s^{-1}$ calculated by |                         |                         |
|-----------------------|---------------------|----------------------------------|-------------------------|-------------------------|
|                       |                     | 1a                               | $L^{Me}FeH_2BEt_2$      | $L^{Me}FeEt$            |
| $4.0 \times 10^{-3}$  | 0.12                | $5.3(2) \times 10^{-3}$          | $5.8(2) \times 10^{-3}$ | $5.5(4) \times 10^{-3}$ |
| $8.0 \times 10^{-3}$  | 0.24                | $5.2(1) \times 10^{-3}$          | $4.8(4) \times 10^{-3}$ | $4.8(3) \times 10^{-3}$ |
| $15.9 \times 10^{-3}$ | 0.48                | $4.8(4) \times 10^{-3}$          | $4.4(3) \times 10^{-3}$ | $4.5(3) \times 10^{-3}$ |

### 4. Solvent effect on rate constant

Table SI.3. Solvent effect on rate constant (without  $Hg^0$ )

| Solvent                                                                                | [BEt <sub>3</sub> ] | [1a]    | Observed rate constant $k_{obs} (s^{-1})$ |
|----------------------------------------------------------------------------------------|---------------------|---------|-------------------------------------------|
| $C_6D_6$                                                                               | 419 mM              | 21.1 mM | $3.33(1) \times 10^{-3}$                  |
| THF-d <sub>8</sub>                                                                     | 419 mM              | 23.2 mM | $5.77(5) \times 10^{-3}$                  |
| 75% o-C <sub>6</sub> H <sub>4</sub> F <sub>2</sub> + 25% C <sub>6</sub> D <sub>6</sub> | 419 mM              | 24.5 mM | $2.57(3) \times 10^{-3}$ <sup>a</sup>     |

a. THF may coordinate to iron during the reaction. An instant color change of the reaction mixture from brown to red in liquid nitrogen supports this possibility. Thus, the rate constant obtained from THF may not be representative of the same reaction.

### 3. Activation parameters

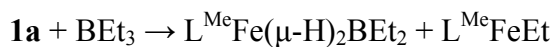

Table SI.3. Reaction rate constants at different temperature.

| Entry | $\Delta\delta(\text{std})$ | T / K  | 1/ T<br>(x value) | k                       | ln(k/T)<br>(y value) |
|-------|----------------------------|--------|-------------------|-------------------------|----------------------|
| 1     | 1.3194                     | 332.86 | 0.00300           | $5.42(2)\times 10^{-2}$ | -8.72                |
| 2     | 1.4074                     | 324.03 | 0.00309           | $1.88(2)\times 10^{-2}$ | -9.76                |
| 3     | 1.5095                     | 313.79 | 0.00319           | $5.24(1)\times 10^{-3}$ | -11.00               |
| 4     | 1.5991                     | 304.80 | 0.00328           | $1.45(1)\times 10^{-3}$ | -12.26               |
| 5     | 1.6014                     | 294.71 | 0.00339           | $4.99(1)\times 10^{-4}$ | -13.29               |
| 6     | 1.6726                     | 287.16 | 0.00348           | $2.10(9)\times 10^{-4}$ | -14.13               |
| 7     | 1.7391                     | 279.69 | 0.00358           | $8.79(2)\times 10^{-5}$ | -14.97               |

$$\ln(k/T) = -(\Delta H^\ddagger/R)(1/T) + (\Delta S^\ddagger/R) + \ln(k_B/T),$$

where  $\ln(k_B/h) = 23.76$  and  $R = 1.987 \text{ cal}\cdot\text{K}^{-1}\cdot\text{mol}^{-1}$   
 $\Delta H^\ddagger = 21.8 \pm 0.8 \text{ kcal}\cdot\text{mol}^{-1}$   
 $\Delta S^\ddagger = 1 \pm 2 \text{ eu}$

The Eyring plot is shown in the paper.

Table SI.4. Observed rate constant at various temperature.

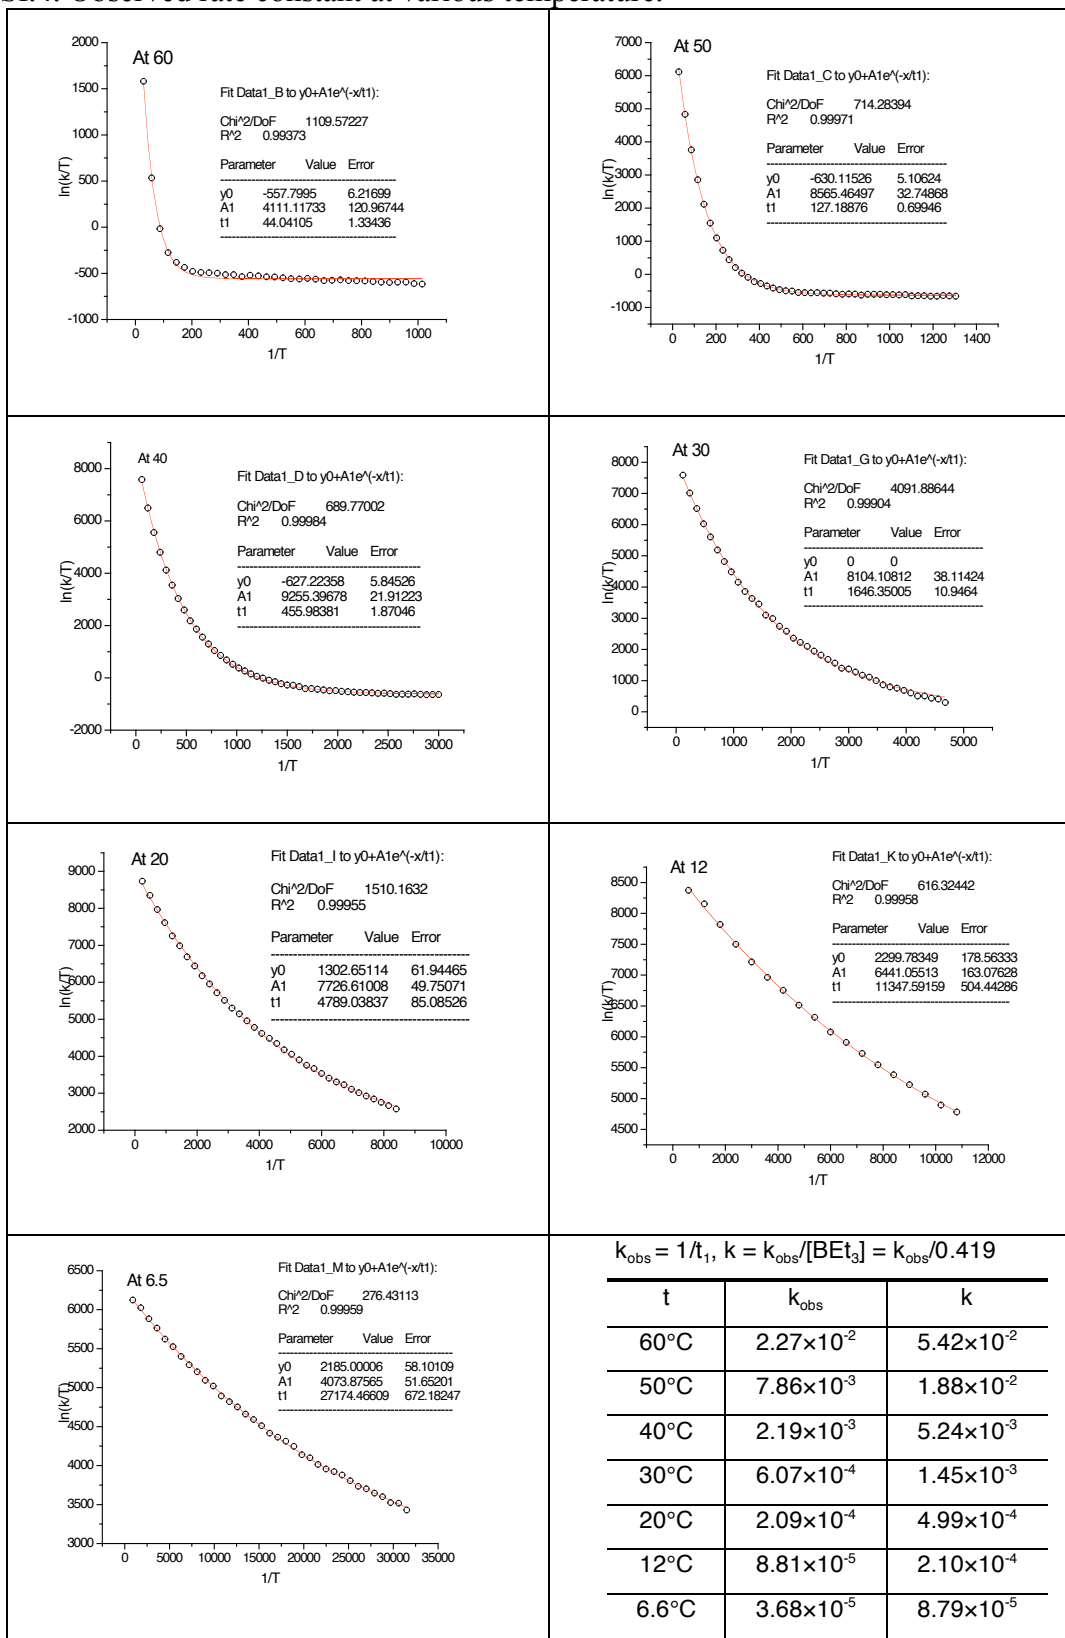

**NMR titration of H<sub>2</sub>NNH<sub>2</sub> binding.** To a solution of **1a** (21 mg) in benzene-*d*<sub>6</sub> (1.0 mL) was added hydrazine in small aliquots (0.4 μL each time) using a syringe. The <sup>1</sup>H NMR spectrum was recorded after each addition. The titration curve and Job plot show that the stoichiometry is 1:1.

Table SI.5a. NMR titration data at 260 ppm.

| H <sub>2</sub> NNH <sub>2</sub> :<br>L <sup>Me</sup> Fe(H) <sub>2</sub> BEt <sub>2</sub> | Chemical<br>shift / ppm |
|------------------------------------------------------------------------------------------|-------------------------|
| 0                                                                                        | 208.072                 |
| 0.17                                                                                     | 215.762                 |
| 0.33                                                                                     | 224.498                 |
| 0.49                                                                                     | 232.503                 |
| 0.66                                                                                     | 242.134                 |
| 0.82                                                                                     | 258.893                 |
| 0.99                                                                                     | 261.421                 |
| 1.15                                                                                     | 262.758                 |
| 1.32                                                                                     | 262.911                 |
| 1.48                                                                                     | 263.487                 |
| 1.65                                                                                     | 264.034                 |
| 1.81                                                                                     | 264.607                 |
| 1.98                                                                                     | 264.882                 |
| 2.14                                                                                     | 265.095                 |

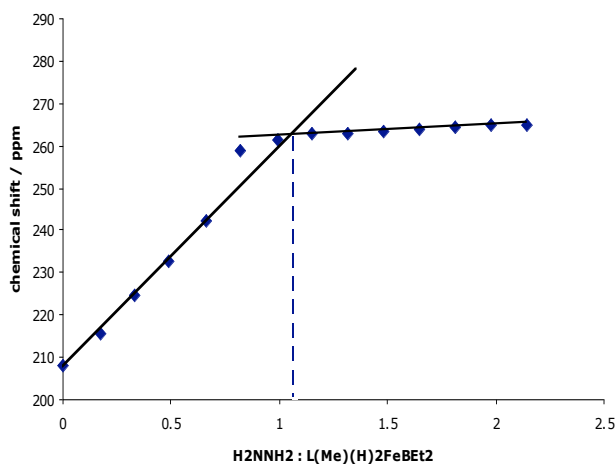

Figure SI.2a. Job plot using peak near 260 ppm

Table SI.5b. NMR titration data at 19 ppm.

| H <sub>2</sub> NNH <sub>2</sub> :<br>L <sup>Me</sup> Fe(H) <sub>2</sub> BEt <sub>2</sub> | Chemical<br>shift / ppm |
|------------------------------------------------------------------------------------------|-------------------------|
| 0                                                                                        | 46.008                  |
| 0.17                                                                                     | 41.573                  |
| 0.33                                                                                     | 36.581                  |
| 0.49                                                                                     | 31.935                  |
| 0.66                                                                                     | 26.828                  |
| 0.82                                                                                     | 20.197                  |
| 0.99                                                                                     | 18.8                    |
| 1.15                                                                                     | 17.962                  |
| 1.32                                                                                     | 17.522                  |
| 1.48                                                                                     | 17.256                  |
| 1.65                                                                                     | 17.108                  |
| 1.81                                                                                     | 17.047                  |
| 1.98                                                                                     | 16.925                  |
| 2.14                                                                                     | 16.85                   |

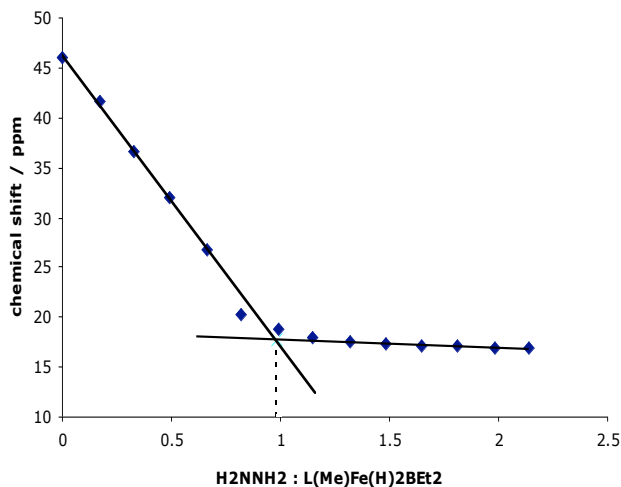

Figure SI.2b. Job plot using peak near 19 ppm

**Gas Chromatography Method for Detecting Free Hydrogen.** Calibration plot: toluene (3 mL) and a magnetic stir bar were placed in a 25 mL round bottom flask. The flask was capped by an adaptor with a Teflon pin. The open end of the adaptor was closed with a rubber septum. Using a syringe, 8 mL of the gas inside was removed and 8 mL CH<sub>4</sub> (1043 mbar) was injected into the closed system as an internal standard. A sample of H<sub>2</sub> was added to the flask (2 mL each time, 1051 mbar). Finally, 20  $\mu$ L of the gas was withdrawn and injected into the GC. The amount of hydrogen was detected by GC-17A (Shimadzu) with a molecular 5 $\text{\AA}$  column (30 m  $\times$  0.25 mm, oven temperature 26  $^{\circ}$ C, carrier gas N<sub>2</sub>, 600 kPa). A calibration plot was obtained by plotting GC peak integration ratio of H<sub>2</sub>:CH<sub>4</sub> versus the amount of hydrogen added to the flask.

Table SI.6. GC calibration plot data.

| $V_{\text{H}_2} / \text{mL}$ | Amount of H <sub>2</sub> / $\mu\text{mol}$ | H <sub>2</sub> peak integration | CH <sub>4</sub> peak integration | Integration Ratio H <sub>2</sub> :CH <sub>4</sub> |
|------------------------------|--------------------------------------------|---------------------------------|----------------------------------|---------------------------------------------------|
| 0.2                          | 8.60                                       | 6.085                           | 67.29                            | 0.090                                             |
| 0.2                          | 8.60                                       | 7.598                           | 78.033                           | 0.097                                             |
| 0.3                          | 12.89                                      | 10.899                          | 70.002                           | 0.156                                             |
| 0.6                          | 25.79                                      | 19.571                          | 70.701                           | 0.277                                             |
| 0.6                          | 25.79                                      | 18.441                          | 70.165                           | 0.263                                             |
| 0.8                          | 34.39                                      | 24.54                           | 66.257                           | 0.370                                             |
| 0.8                          | 34.39                                      | 22.226                          | 62.222                           | 0.357                                             |
| 1.0                          | 42.98                                      | 28.784                          | 62.661                           | 0.459                                             |
| 1.0                          | 42.98                                      | 29.119                          | 63.838                           | 0.456                                             |
| 1.2                          | 51.58                                      | 27.994                          | 52.773                           | 0.530                                             |
| 1.2                          | 51.58                                      | 30.233                          | 55.601                           | 0.544                                             |
| 1.4                          | 60.17                                      | 32.736                          | 55.16                            | 0.593                                             |
| 1.4                          | 60.17                                      | 34.504                          | 57.272                           | 0.602                                             |
| 1.6                          | 68.77                                      | 38.649                          | 54.45                            | 0.710                                             |
| 1.6                          | 68.77                                      | 38.348                          | 53.232                           | 0.720                                             |
| 1.8                          | 77.37                                      | 41.791                          | 51.406                           | 0.813                                             |
| 2.0                          | 85.96                                      | 45.382                          | 49.326                           | 0.920                                             |
| 2.0                          | 85.96                                      | 43.223                          | 47.342                           | 0.913                                             |



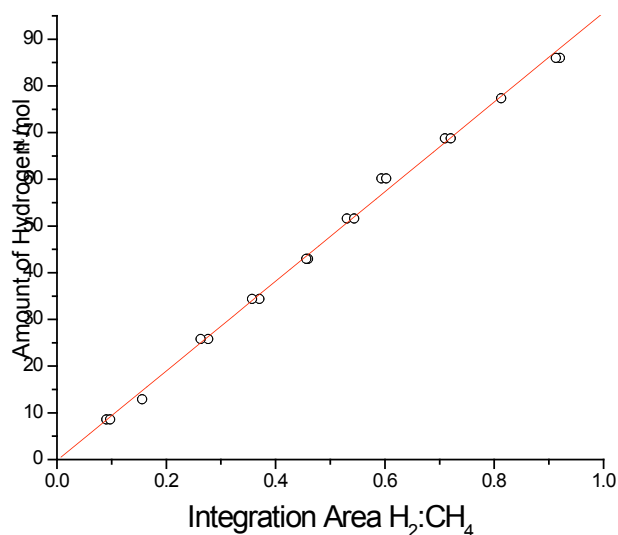

Figure SI.3. GC calibration plot

Detection of H<sub>2</sub> in reactions: To a solution of L<sup>Me</sup>Fe(H<sub>2</sub>NNH<sub>2</sub>)(μ-H)<sub>2</sub>BEt<sub>2</sub> in toluene (3 mL) was added 1 eq. of H<sub>2</sub>NNH<sub>2</sub> and a stir bar in the same round bottom flask used for the calibration plot. The system was closed. Using a syringe, 8 mL gas was taken out. The mixture was shaken at room temperature for 22 h to make L<sup>Me</sup>Fe(H<sub>2</sub>NNH<sub>2</sub>)(μ-H)<sub>2</sub>BEt<sub>2</sub> (**4**). After heating complex **4** at 60 °C for 22 h, 8 mL CH<sub>4</sub> was added and the headspace was subjected to GC analysis as described above. The integration ratio was compared to the calibration plot to quantify the amount of free hydrogen released from the reaction (Table SI.7). The average amount of hydrogen detected from the reaction is 1.67 ± 0.03 per iron.

Table SI.7. Hydrogen detection data.

| L <sup>Me</sup> Fe(H <sub>2</sub> NNH <sub>2</sub> )(μ-H) <sub>2</sub> BEt <sub>2</sub> ( <b>3</b> ) / μmol | H <sub>2</sub> detected / μmol | H <sub>2</sub> : Fe ratio |
|-------------------------------------------------------------------------------------------------------------|--------------------------------|---------------------------|
| 18.8                                                                                                        | 32.3                           | 1.72 : 1                  |
| 35.2                                                                                                        | 58.1                           | 1.65 : 1                  |
| 40.6                                                                                                        | 67.0                           | 1.65 : 1                  |

Control experiments were carried out to determine whether there are alternative paths to form gaseous H<sub>2</sub>. The results are listed in table SI.8.

1. Heating L<sup>Me</sup>Fe(μ-H)<sub>2</sub>BEt<sub>2</sub> without any hydrazine.
2. Stirring hydrazine with iron powder (unactivated) in toluene.
3. Heating hydrazine with iron powder (unactivated) in toluene.

Table SI.8. Control experiments

| Entry    | Reactions                                             | Reaction Condition | Iron Starting Material/ μmol | H <sub>2</sub> detected / μmol | H <sub>2</sub> : Fe ratio |
|----------|-------------------------------------------------------|--------------------|------------------------------|--------------------------------|---------------------------|
| <b>1</b> | L <sup>Me</sup> Fe(μ-H) <sub>2</sub> BEt <sub>2</sub> | 80 °C, 22 hr, tol. | 45.0                         | 3.8                            | 0.08                      |
| <b>2</b> | Fe + H <sub>2</sub> NNH <sub>2</sub>                  | RT, 22 hr, tol.    | 71.6                         | 0                              | 0                         |
| <b>3</b> | Fe + H <sub>2</sub> NNH <sub>2</sub>                  | 80 °C, 22 hr, tol. | 71.6                         | 1.26                           | 0.02                      |

These data show that  $L^{\text{Me}}\text{Fe}(\mu\text{-H})_2\text{BEt}_2$  itself does not lead to the  $\text{H}_2$ , and that trace iron metal (possibly formed during heating) are not competent to produce the excess  $\text{H}_2$ . It is possible that other iron species are capable of catalyzing hydrazine decomposition and releasing free hydrogen. An unidentified black precipitate was always observed along with the formation of  $L^{\text{Me}}\text{Fe}(\mu\text{-NH}_2)_2\text{BEt}_2$  (**4**). Given that the yield of complex **4** is only 60%, the remaining  $\text{H}_2\text{NNH}_2$  may in principle release hydrogen up to 1.8 times of starting material  $L^{\text{Me}}\text{Fe}(\mu\text{-H})_2\text{BEt}_2$  (Scheme SI.1) if it disproportionates to  $\text{N}_2$  and  $\text{H}_2$ . Given the good agreement between the calculated and observed stoichiometries, we tentatively propose that the excess  $\text{H}_2$  is generated through catalytic decomposition of hydrazine by some unidentified iron species.

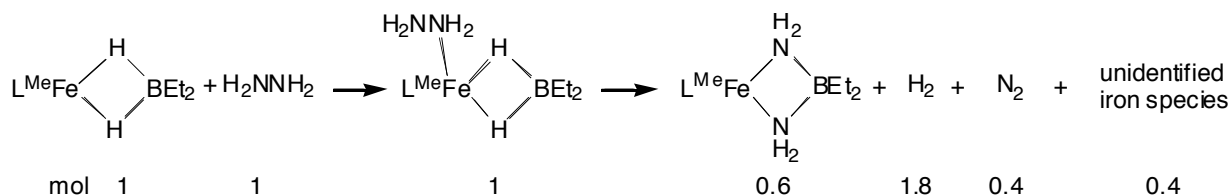

Scheme SI.1. Balanced reaction between iron starting material and free hydrogen.

## IR Spectra of Complex 4 and 5.

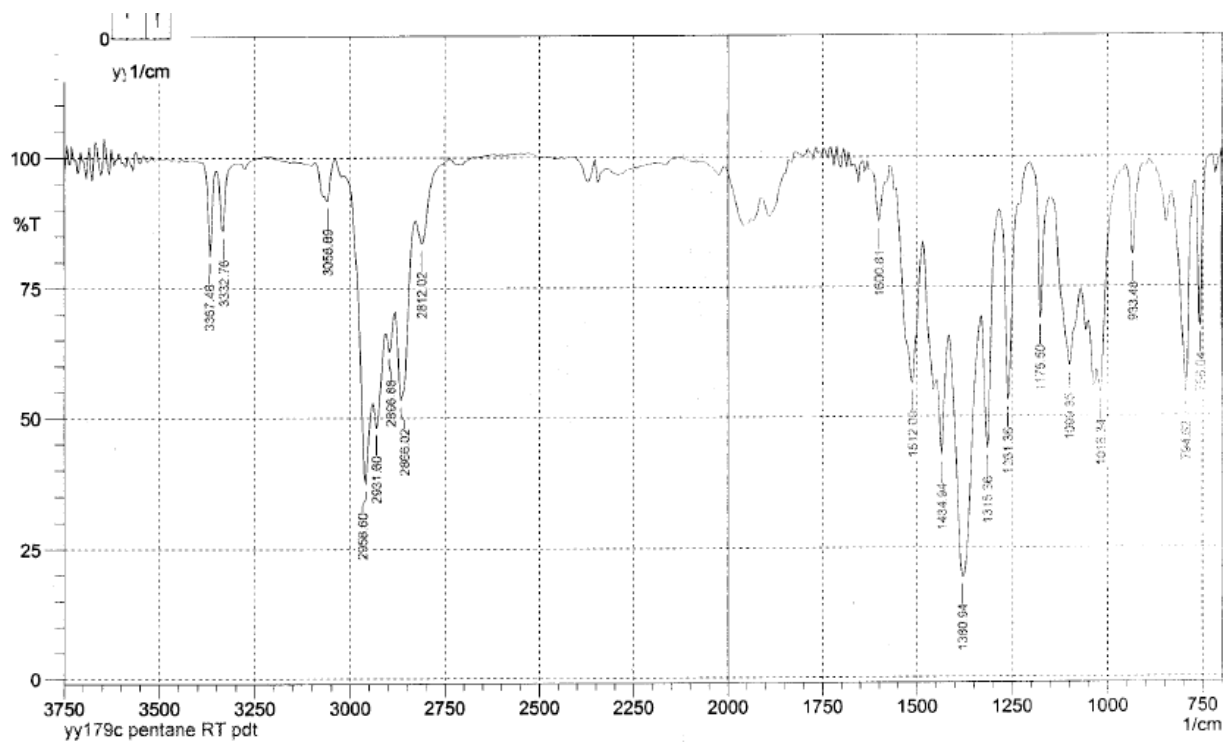

Figure SI.4a. IR spectrum of  $L^{\text{Me}}\text{Fe}(\text{H}_2\text{NNH}_2)(\mu\text{-H})_2\text{BEt}_2$  (4).

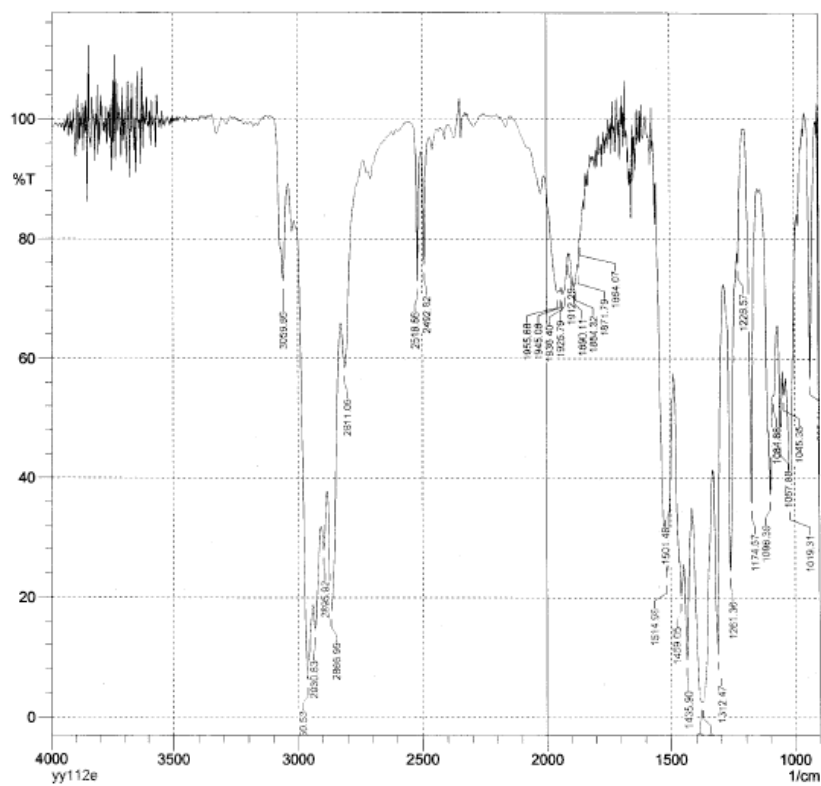

Figure SI.4b. IR spectrum of  $L^{\text{Me}}\text{Fe}(\text{D}_2\text{NND}_2)(\mu\text{-H})_2\text{BEt}_2$  (4- $d_4$ ).

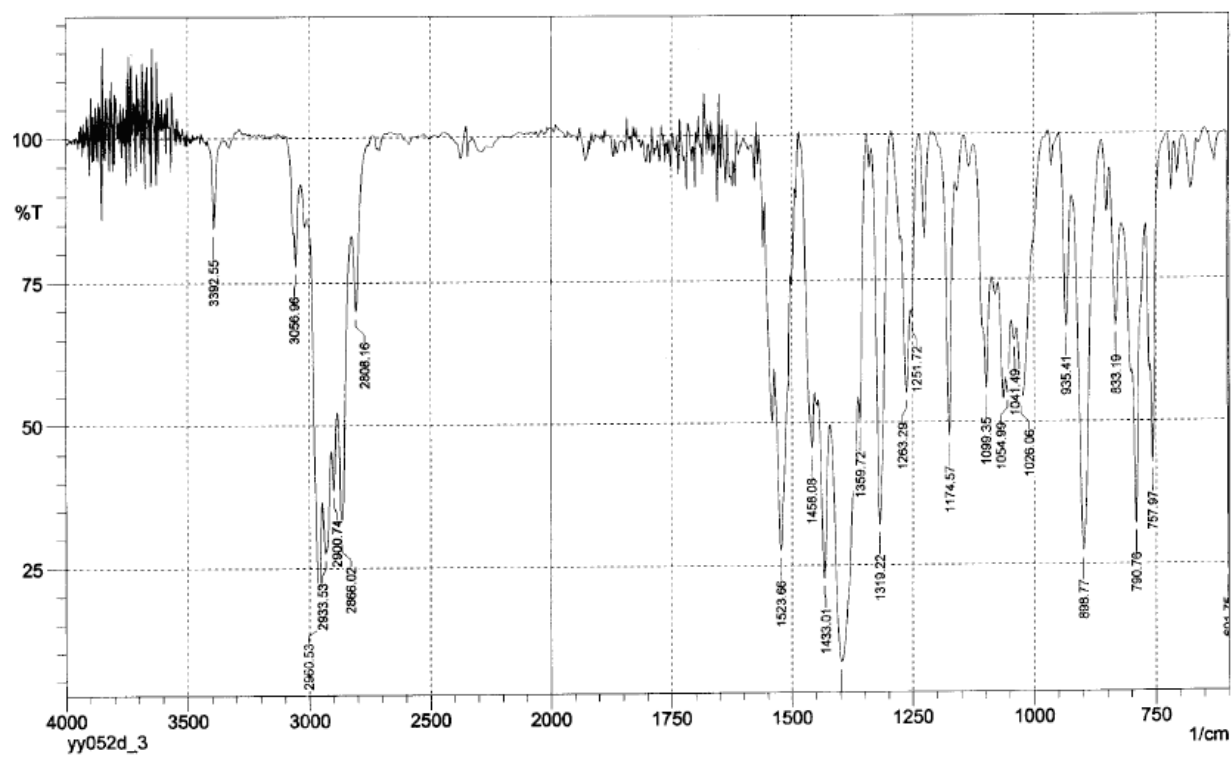

Figure SI.5a. IR spectrum of  $L^{\text{Me}}\text{Fe}(\mu\text{-NH}_2)_2\text{BEt}_2$  (5).

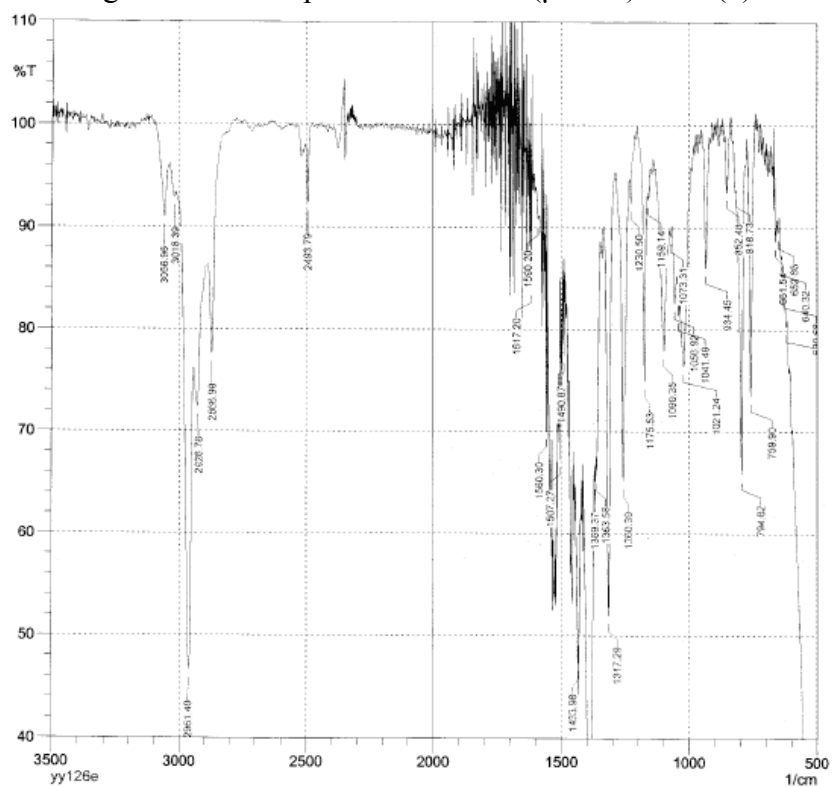

Figure SI.5b. IR spectrum of  $L^{\text{Me}}\text{Fe}(\mu\text{-ND}_2)_2\text{BEt}_2$  (5-d<sub>4</sub>).

## M-H-B Cambridge Data Base Search results.

Table SI.9. Cambridge data base search results for B-H distances in  $M(\mu\text{-H})_2\text{BR}_2$

| Refcode | B-H distance /Å | Refcode  | B-H distance /Å | Refcode  | B-H distance /Å |
|---------|-----------------|----------|-----------------|----------|-----------------|
| AGEXAL  | 1.298, 1.281    | PIKNAY   | 1.374, 1.374    | WUQQAA   | 1.192, 1.260    |
| BAJHAW  | 1.237, 1.272    | PUCMOP   | 1.094, 1.201    | WUQQAA   | 1.187, 1.265    |
| BAJHAW  | 1.251, 1.330    | SURPUQ   | 1.192, 1.233    | WUQQEE   | 1.263, 1.208    |
| BAJHAW  | 1.219, 1.265    | SURPUQ   | 1.240, 1.295    | ZAZVUR   | 1.279, 1.252    |
| BAJHEA  | 1.186, 1.210    | SUWROR   | 1.269, 1.238    | ZUBGAE   | 1.228, 1.236    |
| BAJHEA  | 1.266, 1.238    | SUWRUX   | 1.269, 1.302    | ZUBGAE01 | 1.228, 1.236    |
| BAJHEA  | 1.251, 1.211    | SUWSAE   | 1.343, 1.177    | LARFEQ   | 1.197, 1.238    |
| BAJHIE  | 1.175, 1.201    | SUWSEI   | 1.264, 1.263    | LARFEQ   | 1.240, 1.240    |
| BAJHIE  | 1.180, 1.234    | SUWSIM   | 1.289, 1.235    | LARFIU   | 1.177, 1.181    |
| BAJHOK  | 0.556, 1.371    | SUWSIM01 | 1.298, 1.334    | LARFIU   | 1.222, 1.213    |
| BAJHOK  | 1.164, 1.395    | UMOWUO   | 1.217, 1.097    | LARFIU   | 1.179, 1.228    |
| BAZSIF  | 1.350, 1.366    | UMOXAV   | 1.149, 1.054    | LARFOA   | 1.202, 1.174    |
| BAZSIF  | 1.402, 1.404    | VAMTIM   | 1.148, 1.211    | LARFOA   | 1.218, 1.184    |
| BEBPUT  | 1.285, 1.382    | VAMVAG   | 1.320, 1.193    | LARFOA   | 1.167, 1.242    |
| COQTAD  | 1.241, 1.186    | VAMXIQ   | 1.150, 1.228    | LARFOA   | 1.247, 1.226    |
| FAPXUQ  | 1.340, 1.342    | WEFZIQ   | 1.320, 1.320    | LARFOA   | 1.218, 1.214    |
| FOJMEX  | 1.024, 1.150    | WEFZIQ   | 1.320, 1.320    | LARFOA   | 1.225, 1.226    |
| FOJMEX  | 1.365, 1.084    | WEFZIQ01 | 1.205, 1.208    | NAQVUX   | 1.346, 1.313    |
| LOCWAB  | 1.205, 1.206    | WEFZIQ01 | 1.207, 1.215    | XALGUN   | 1.302, 1.296    |
| LOCWEF  | 1.053, 1.280    | WEFZIQ02 | 1.150, 1.106    | XALGUN   | 1.285, 1.269    |
| LOCWIJ  | 1.206, 1.171    | WEFZIQ02 | 1.057, 1.142    | XALGUN   | 1.248, 1.302    |
| NULSAO  | 1.182, 1.186    | WEZGUD   | 1.387, 1.382    | XALGUN   | 1.285, 1.302    |
| NULSES  | 1.104, 1.203    | WEZGUD01 | 1.261, 1.320    |          |                 |

The average B-H distance based on table SI.9 is 1.24 Å with standard deviation of 0.09 Å.

Analysis used CSD 5.27 (May 2006), ConQuest 1.8, VISTA 2.1c.

## Fe-(N<sub>2</sub>H<sub>4</sub>) Cambridge Data Base Search results

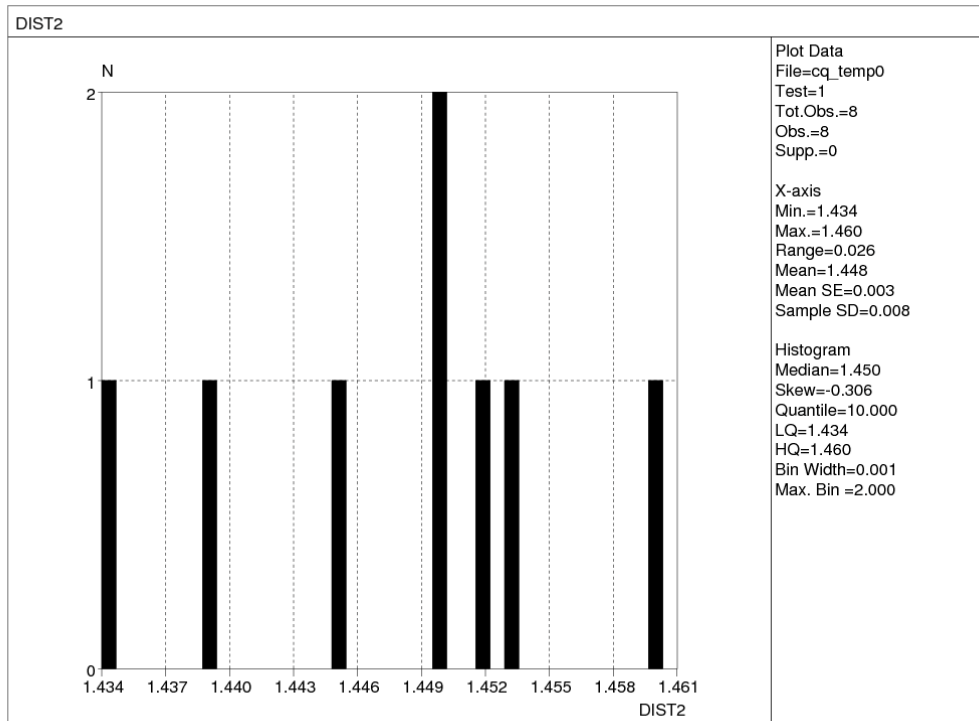

Figure SI.6a. Histogram of N-N distance in Fe-(N<sub>2</sub>H<sub>4</sub>) complexes.

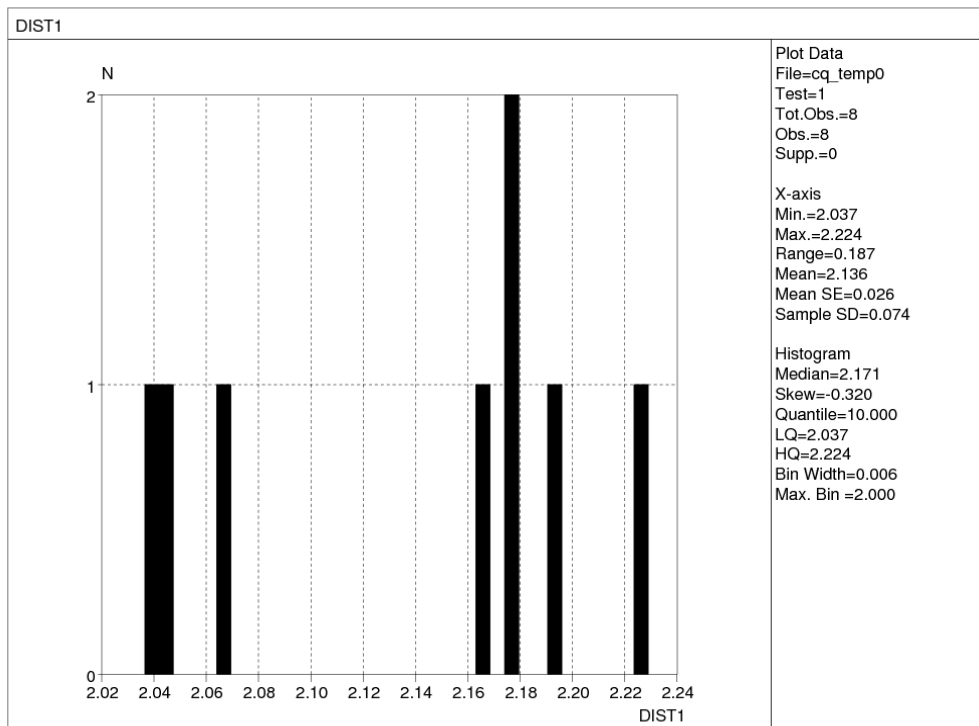

Figure SI.6b. Histogram of Fe-N distance in Fe-(N<sub>2</sub>H<sub>4</sub>) complexes.

**X-ray Crystallography.** Single crystals, selected from batches immersed in Paratone-8277, were mounted on glass fibers and placed immediately into a cold nitrogen stream (-80 °C) on a Siemens SMART Platform diffractometer (MoK $\alpha$  radiation, graphite monochromator) equipped with a CCD area detector. For each data collection, a randomly oriented region of reciprocal space was surveyed: four major sections of frames were collected with 0.3° steps in  $\omega$  at four different  $\phi$  settings and a detector position of -28° in  $2\theta$ .<sup>1</sup> The data were integrated<sup>2</sup> and the intensity data were corrected for absorption.<sup>3</sup> Final cell constants were calculated from the xyz centroids of strong reflections from the actual data collections after integration. Space group assignments were based on statistics related to systematic absences, reflection intensities, and space group frequencies.<sup>4</sup> Each structure was solved by direct methods<sup>5</sup> and was refined by full-matrix least squares on  $F^2$ .<sup>4</sup> All non-hydrogen atoms were refined with anisotropic displacement parameters and all hydrogen atoms were placed in appropriated geometrical positions and refined with relative isotropic displacement parameters, except when noted otherwise. A summary of experimental and refinement details can be found in the tables below.

<sup>1</sup>SMART V5.629, Bruker Analytical X-ray System, Madison, WI (2003).

<sup>2</sup>SAINT V7.06A, Bruker Analytical X-ray Systems, Madison, WI (2003).

<sup>3</sup>SADABS V2.10, An empirical correction for absorption anisotropy, R. Blessing, *Acta Cryst. A* **51**, 33-38 (1995).

<sup>4</sup>SHELXTL V6.14, Bruker Analytical X-ray Systems, Madison, WI (2000).

<sup>5</sup>SIR92, A. Altomare, G. Cascarano, C. Giacovazzo, and A. Gualardi, *J. Appl. Cryst.* **26**, 343-350 (1993).

**L<sup>Me</sup>Fe(μ-H)<sub>2</sub>BEt<sub>2</sub> (complex 2a).**

Table SI.10a. Crystal data and structure refinement for holyy2a.

---

|                                        |                                                              |                           |
|----------------------------------------|--------------------------------------------------------------|---------------------------|
| Identification code                    | holyy22                                                      |                           |
| Empirical formula                      | C33 H53 B Fe N2                                              |                           |
| Formula weight                         | 544.43                                                       |                           |
| Temperature                            | 243(2) K                                                     |                           |
| Wavelength                             | 0.71073 Å                                                    |                           |
| Crystal system                         | Monoclinic                                                   |                           |
| Space group                            | C2/c                                                         |                           |
| Unit cell dimensions                   | $a = 15.0387(15)$ Å                                          | $\alpha = 90^\circ$       |
|                                        | $b = 10.5584(10)$ Å                                          | $\beta = 91.965(2)^\circ$ |
|                                        | $c = 20.980(2)$ Å                                            | $\gamma = 90^\circ$       |
| Volume                                 | 3329.4(6) Å <sup>3</sup>                                     |                           |
| Z                                      | 4                                                            |                           |
| Density (calculated)                   | 1.086 Mg/m <sup>3</sup>                                      |                           |
| Absorption coefficient                 | 0.474 mm <sup>-1</sup>                                       |                           |
| $F(000)$                               | 1184                                                         |                           |
| Crystal color, morphology              | red-orange, needle                                           |                           |
| Crystal size                           | 0.50 x 0.12 x 0.04 mm <sup>3</sup>                           |                           |
| Theta range for data collection        | 1.94 to 29.57°                                               |                           |
| Index ranges                           | $-20 \leq h \leq 20, -14 \leq k \leq 14, -29 \leq l \leq 29$ |                           |
| Reflections collected                  | 22469                                                        |                           |
| Independent reflections                | 4665 [ $R(\text{int}) = 0.0250$ ]                            |                           |
| Observed reflections                   | 3814                                                         |                           |
| Completeness to $\theta = 29.57^\circ$ | 99.9%                                                        |                           |
| Absorption correction                  | Multi-scan                                                   |                           |
| Max. and min. transmission             | 0.9813 and 0.7974                                            |                           |
| Refinement method                      | Full-matrix least-squares on $F^2$                           |                           |
| Data / restraints / parameters         | 4665 / 0 / 196                                               |                           |
| Goodness-of-fit on $F^2$               | 1.025                                                        |                           |
| Final $R$ indices [ $I > 2\sigma(I)$ ] | $R1 = 0.0354, wR2 = 0.0981$                                  |                           |
| $R$ indices (all data)                 | $R1 = 0.0459, wR2 = 0.1037$                                  |                           |
| Largest diff. peak and hole            | 0.274 and -0.218 e.Å <sup>-3</sup>                           |                           |

---



Table SI.10b. Bond lengths [ $\text{\AA}$ ] and angles [ $^\circ$ ] for **2a**.

|               |            |                   |            |
|---------------|------------|-------------------|------------|
| Fe-H(1)#1     | 1.744(15)  | C(12)-C(62)       | 1.4034(19) |
| Fe-N(11)      | 1.9711(10) | C(12)-C(22)       | 1.408(2)   |
| Fe-N(11)#1    | 1.9711(10) | C(22)-C(32)       | 1.396(2)   |
| Fe-B          | 2.237(3)   | C(22)-C(72)       | 1.514(3)   |
| Fe-B#1        | 2.237(3)   | C(32)-C(42)       | 1.374(3)   |
| Fe-H(1)       | 1.744(15)  | C(32)-H(32A)      | 0.9400     |
| B-H(1)#1      | 1.214(16)  | C(42)-C(52)       | 1.370(3)   |
| B-C(1)        | 1.589(6)   | C(42)-H(42A)      | 0.9400     |
| B-C(3)        | 1.596(5)   | C(52)-C(62)       | 1.398(2)   |
| B-H(1)        | 1.349(16)  | C(52)-H(52A)      | 0.9400     |
| C(1)-C(2)     | 1.521(7)   | C(62)-C(102)      | 1.516(2)   |
| C(1)-H(1B)    | 0.9800     | C(72)-C(92)       | 1.512(3)   |
| C(1)-H(1C)    | 0.9800     | C(72)-C(82)       | 1.523(3)   |
| C(2)-H(2A)    | 0.9700     | C(72)-H(72A)      | 0.9900     |
| C(2)-H(2B)    | 0.9700     | C(82)-H(82A)      | 0.9700     |
| C(2)-H(2C)    | 0.9700     | C(82)-H(82B)      | 0.9700     |
| C(3)-C(4)     | 1.482(6)   | C(82)-H(82C)      | 0.9700     |
| C(3)-H(3A)    | 0.9800     | C(92)-H(92A)      | 0.9700     |
| C(3)-H(3B)    | 0.9800     | C(92)-H(92B)      | 0.9700     |
| C(4)-H(4A)    | 0.9700     | C(92)-H(92C)      | 0.9700     |
| C(4)-H(4B)    | 0.9700     | C(102)-C(112)     | 1.523(3)   |
| C(4)-H(4C)    | 0.9700     | C(102)-C(122)     | 1.537(2)   |
| N(11)-C(21)   | 1.3326(16) | C(102)-H(10A)     | 0.9900     |
| N(11)-C(12)   | 1.4361(15) | C(112)-H(11G)     | 0.9700     |
| C(11)-C(21)   | 1.5099(18) | C(112)-H(11H)     | 0.9700     |
| C(11)-H(11A)  | 0.9700     | C(112)-H(11I)     | 0.9700     |
| C(11)-H(11B)  | 0.9700     | C(122)-H(12A)     | 0.9700     |
| C(11)-H(11C)  | 0.9700     | C(122)-H(12B)     | 0.9700     |
| C(11)-H(11D)  | 0.9700     | C(122)-H(12C)     | 0.9700     |
| C(11)-H(11E)  | 0.9700     | H(1)#1-Fe-N(11)   | 124.2(5)   |
| C(11)-H(11F)  | 0.9700     | H(1)#1-Fe-N(11)#1 | 123.0(5)   |
| C(21)-C(31)   | 1.3995(16) | N(11)-Fe-N(11)#1  | 95.92(6)   |
| C(31)-C(21)#1 | 1.3995(16) | H(1)#1-Fe-B       | 32.6(5)    |
| C(31)-H(31A)  | 0.9400     | N(11)-Fe-B        | 125.53(13) |

|                    |            |                      |            |
|--------------------|------------|----------------------|------------|
| N(11)#1-Fe-B       | 138.46(14) | C(21)-C(11)-H(11B)   | 109.5      |
| H(1)#1-Fe-B#1      | 37.1(5)    | H(11A)-C(11)-H(11B)  | 109.5      |
| N(11)-Fe-B#1       | 138.46(14) | C(21)-C(11)-H(11C)   | 109.5      |
| N(11)#1-Fe-B#1     | 125.53(13) | H(11A)-C(11)-H(11C)  | 109.5      |
| B-Fe-B#1           | 13.80(17)  | H(11B)-C(11)-H(11C)  | 109.5      |
| H(1)#1-Fe-H(1)     | 68.6(10)   | C(21)-C(11)-H(11D)   | 109.5      |
| N(11)-Fe-H(1)      | 123.0(5)   | H(11A)-C(11)-H(11D)  | 141.1      |
| N(11)#1-Fe-H(1)    | 124.2(5)   | H(11B)-C(11)-H(11D)  | 56.3       |
| B-Fe-H(1)          | 37.1(5)    | H(11C)-C(11)-H(11D)  | 56.3       |
| B#1-Fe-H(1)        | 32.6(5)    | C(21)-C(11)-H(11E)   | 109.5      |
| H(1)#1-B-C(1)      | 112.4(8)   | H(11A)-C(11)-H(11E)  | 56.3       |
| H(1)#1-B-C(3)      | 109.1(9)   | H(11B)-C(11)-H(11E)  | 141.1      |
| C(1)-B-C(3)        | 114.3(3)   | H(11C)-C(11)-H(11E)  | 56.3       |
| H(1)#1-B-Fe        | 50.7(7)    | H(11D)-C(11)-H(11E)  | 109.5      |
| C(1)-B-Fe          | 116.4(3)   | C(21)-C(11)-H(11F)   | 109.5      |
| C(3)-B-Fe          | 129.3(3)   | H(11A)-C(11)-H(11F)  | 56.3       |
| H(1)#1-B-H(1)      | 100.0(13)  | H(11B)-C(11)-H(11F)  | 56.3       |
| C(1)-B-H(1)        | 114.2(9)   | H(11C)-C(11)-H(11F)  | 141.1      |
| C(3)-B-H(1)        | 105.8(7)   | H(11D)-C(11)-H(11F)  | 109.5      |
| Fe-B-H(1)          | 51.2(7)    | H(11E)-C(11)-H(11F)  | 109.5      |
| C(2)-C(1)-B        | 114.4(5)   | N(11)-C(21)-C(31)    | 123.72(13) |
| C(2)-C(1)-H(1B)    | 108.7      | N(11)-C(21)-C(11)    | 119.59(12) |
| B-C(1)-H(1B)       | 108.7      | C(31)-C(21)-C(11)    | 116.69(13) |
| C(2)-C(1)-H(1C)    | 108.7      | C(21)-C(31)-C(21)#1  | 129.56(18) |
| B-C(1)-H(1C)       | 108.7      | C(21)-C(31)-H(31A)   | 115.2      |
| H(1B)-C(1)-H(1C)   | 107.6      | C(21)#1-C(31)-H(31A) | 115.2      |
| C(4)-C(3)-B        | 116.7(3)   | C(62)-C(12)-C(22)    | 121.92(13) |
| C(4)-C(3)-H(3A)    | 108.1      | C(62)-C(12)-N(11)    | 119.27(12) |
| B-C(3)-H(3A)       | 108.1      | C(22)-C(12)-N(11)    | 118.61(12) |
| C(4)-C(3)-H(3B)    | 108.1      | C(32)-C(22)-C(12)    | 117.33(16) |
| B-C(3)-H(3B)       | 108.1      | C(32)-C(22)-C(72)    | 121.16(16) |
| H(3A)-C(3)-H(3B)   | 107.3      | C(12)-C(22)-C(72)    | 121.50(14) |
| C(21)-N(11)-C(12)  | 120.59(10) | C(42)-C(32)-C(22)    | 121.38(17) |
| C(21)-N(11)-Fe     | 123.47(8)  | C(42)-C(32)-H(32A)   | 119.3      |
| C(12)-N(11)-Fe     | 115.87(8)  | C(22)-C(32)-H(32A)   | 119.3      |
| C(21)-C(11)-H(11A) | 109.5      | C(52)-C(42)-C(32)    | 120.54(16) |

|                     |            |                      |            |
|---------------------|------------|----------------------|------------|
| C(52)-C(42)-H(42A)  | 119.7      | H(92A)-C(92)-H(92B)  | 109.5      |
| C(32)-C(42)-H(42A)  | 119.7      | C(72)-C(92)-H(92C)   | 109.5      |
| C(42)-C(52)-C(62)   | 121.16(18) | H(92A)-C(92)-H(92C)  | 109.5      |
| C(42)-C(52)-H(52A)  | 119.4      | H(92B)-C(92)-H(92C)  | 109.5      |
| C(62)-C(52)-H(52A)  | 119.4      | C(62)-C(102)-C(112)  | 110.49(16) |
| C(52)-C(62)-C(12)   | 117.65(15) | C(62)-C(102)-C(122)  | 112.58(15) |
| C(52)-C(62)-C(102)  | 120.35(15) | C(112)-C(102)-C(122) | 110.45(16) |
| C(12)-C(62)-C(102)  | 121.96(12) | C(62)-C(102)-H(10A)  | 107.7      |
| C(92)-C(72)-C(22)   | 111.48(18) | C(112)-C(102)-H(10A) | 107.7      |
| C(92)-C(72)-C(82)   | 108.6(2)   | C(122)-C(102)-H(10A) | 107.7      |
| C(22)-C(72)-C(82)   | 114.1(2)   | C(102)-C(112)-H(11G) | 109.5      |
| C(92)-C(72)-H(72A)  | 107.4      | C(102)-C(112)-H(11H) | 109.5      |
| C(22)-C(72)-H(72A)  | 107.4      | H(11G)-C(112)-H(11H) | 109.5      |
| C(82)-C(72)-H(72A)  | 107.4      | C(102)-C(112)-H(11I) | 109.5      |
| C(72)-C(82)-H(82A)  | 109.5      | H(11G)-C(112)-H(11I) | 109.5      |
| C(72)-C(82)-H(82B)  | 109.5      | H(11H)-C(112)-H(11I) | 109.5      |
| H(82A)-C(82)-H(82B) | 109.5      | C(102)-C(122)-H(12A) | 109.5      |
| C(72)-C(82)-H(82C)  | 109.5      | C(102)-C(122)-H(12B) | 109.5      |
| H(82A)-C(82)-H(82C) | 109.5      | H(12A)-C(122)-H(12B) | 109.5      |
| H(82B)-C(82)-H(82C) | 109.5      | C(102)-C(122)-H(12C) | 109.5      |
| C(72)-C(92)-H(92A)  | 109.5      | H(12A)-C(122)-H(12C) | 109.5      |
| C(72)-C(92)-H(92B)  | 109.5      | H(12B)-C(122)-H(12C) | 109.5      |

---

Symmetry transformations used to generate equivalent atoms:

#1 -x,y,-z+1/2

$L^{Me}Fe(\mu-H)_2BPh_2$  (Complex 2b).

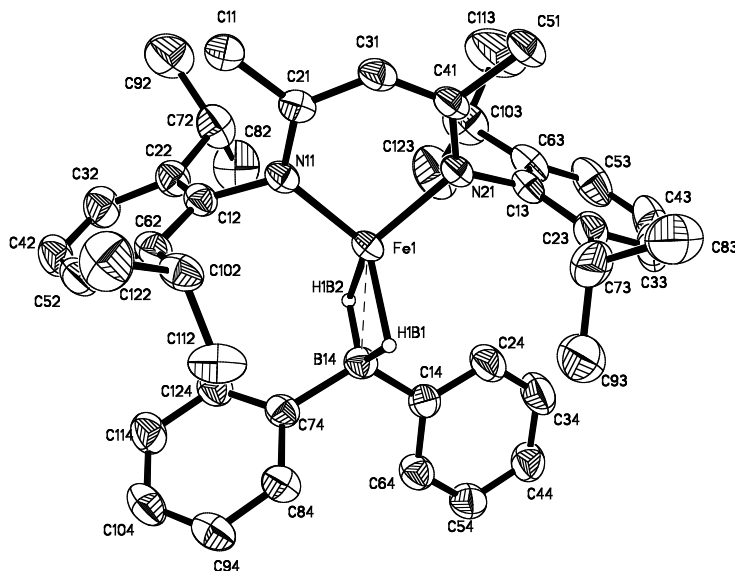

Figure SI.7. Thermal-ellipsoid plot of the molecular structure of  $L^{Me}Fe(\mu-H)_2BPh_2$  (**2b**)

Table SI.11a. Crystal data and structure refinement for **2b**.

|                           |                                                     |                        |
|---------------------------|-----------------------------------------------------|------------------------|
| Identification code       | holyy21                                             |                        |
| Empirical formula         | C <sub>41</sub> H <sub>53</sub> B Fe N <sub>2</sub> |                        |
| Formula weight            | 640.51                                              |                        |
| Temperature               | 180.0(1) K                                          |                        |
| Wavelength                | 0.71073 Å                                           |                        |
| Crystal system            | Triclinic                                           |                        |
| Space group               | <i>P</i> -1                                         |                        |
| Unit cell dimensions      | <i>a</i> = 11.6217(3) Å                             | $\alpha$ = 100.311(1)° |
|                           | <i>b</i> = 12.3076(3) Å                             | $\beta$ = 107.099(1)°  |
|                           | <i>c</i> = 15.5599(6) Å                             | $\gamma$ = 112.180(1)° |
| Volume                    | 1861.09(10) Å <sup>3</sup>                          |                        |
| <i>Z</i>                  | 2                                                   |                        |
| Density (calculated)      | 1.143 Mg/m <sup>3</sup>                             |                        |
| Absorption coefficient    | 0.434 mm <sup>-1</sup>                              |                        |
| <i>F</i> (000)            | 688                                                 |                        |
| Crystal color, morphology | red-orange, block                                   |                        |

|                                                     |                                                               |
|-----------------------------------------------------|---------------------------------------------------------------|
| Crystal size                                        | 0.28 x 0.28 x 0.22 mm <sup>3</sup>                            |
| Theta range for data collection                     | 1.45 to 30.03°                                                |
| Index ranges                                        | -16 ≤ <i>h</i> ≤ 16, -17 ≤ <i>k</i> ≤ 17, -21 ≤ <i>l</i> ≤ 21 |
| Reflections collected                               | 29092                                                         |
| Independent reflections                             | 10746 [ <i>R</i> (int) = 0.0216]                              |
| Observed reflections                                | 9067                                                          |
| Completeness to theta = 30.03°                      | 98.6%                                                         |
| Absorption correction                               | Multi-scan                                                    |
| Max. and min. transmission                          | 0.9105 and 0.8881                                             |
| Refinement method                                   | Full-matrix least-squares on <i>F</i> <sup>2</sup>            |
| Data / restraints / parameters                      | 10746 / 3 / 431                                               |
| Goodness-of-fit on <i>F</i> <sup>2</sup>            | 1.053                                                         |
| Final <i>R</i> indices [ <i>I</i> > 2σ( <i>I</i> )] | <i>R</i> 1 = 0.0418, <i>wR</i> 2 = 0.1141                     |
| <i>R</i> indices (all data)                         | <i>R</i> 1 = 0.0506, <i>wR</i> 2 = 0.1197                     |
| Largest diff. peak and hole                         | 0.540 and -0.223 e.Å <sup>-3</sup>                            |

Table SI.11b. Bond lengths [Å] and angles [°] for **2b**.

|              |            |              |            |
|--------------|------------|--------------|------------|
| Fe(1)-N(11)  | 1.9626(11) | C(21)-C(31)  | 1.4020(18) |
| Fe(1)-N(21)  | 1.9765(10) | C(31)-C(41)  | 1.398(2)   |
| Fe(1)-B(14)  | 2.2391(15) | C(31)-H(31A) | 0.9500     |
| Fe(1)-H(1B1) | 1.724(16)  | C(41)-C(51)  | 1.5092(19) |
| Fe(1)-H(1B2) | 1.716(17)  | C(51)-H(51A) | 0.9800     |
| B(14)-C(14)  | 1.600(2)   | C(51)-H(51B) | 0.9800     |
| B(14)-C(74)  | 1.603(2)   | C(51)-H(51C) | 0.9800     |
| B(14)-H(1B1) | 1.277(16)  | C(12)-C(62)  | 1.4057(18) |
| B(14)-H(1B2) | 1.190(16)  | C(12)-C(22)  | 1.4071(19) |
| N(11)-C(21)  | 1.3396(16) | C(22)-C(32)  | 1.398(2)   |
| N(11)-C(12)  | 1.4456(16) | C(22)-C(72)  | 1.513(2)   |
| N(21)-C(41)  | 1.3368(17) | C(32)-C(42)  | 1.381(2)   |
| N(21)-C(13)  | 1.4401(17) | C(32)-H(32A) | 0.9500     |
| C(11)-C(21)  | 1.5044(19) | C(42)-C(52)  | 1.377(3)   |
| C(11)-H(11A) | 0.9800     | C(42)-H(42A) | 0.9500     |
| C(11)-H(11B) | 0.9800     | C(52)-C(62)  | 1.394(2)   |
| C(11)-H(11C) | 0.9800     | C(52)-H(52A) | 0.9500     |

|               |          |               |          |
|---------------|----------|---------------|----------|
| C(62)-C(102)  | 1.524(2) | C(93)-H(93A)  | 0.9800   |
| C(72)-C(82)   | 1.533(3) | C(93)-H(93B)  | 0.9800   |
| C(72)-C(92)   | 1.536(3) | C(93)-H(93C)  | 0.9800   |
| C(72)-H(72A)  | 1.0000   | C(103)-C(123) | 1.527(4) |
| C(82)-H(82A)  | 0.9800   | C(103)-C(113) | 1.554(4) |
| C(82)-H(82B)  | 0.9800   | C(103)-H(10B) | 1.0000   |
| C(82)-H(82C)  | 0.9800   | C(113)-H(11G) | 0.9800   |
| C(92)-H(92A)  | 0.9800   | C(113)-H(11H) | 0.9800   |
| C(92)-H(92B)  | 0.9800   | C(113)-H(11I) | 0.9800   |
| C(92)-H(92C)  | 0.9800   | C(123)-H(12D) | 0.9800   |
| C(102)-C(112) | 1.524(2) | C(123)-H(12E) | 0.9800   |
| C(102)-C(122) | 1.530(2) | C(123)-H(12F) | 0.9800   |
| C(102)-H(10A) | 1.0000   | C(11')-H(11K) | 0.9800   |
| C(112)-H(11D) | 0.9800   | C(11')-H(11L) | 0.9800   |
| C(112)-H(11E) | 0.9800   | C(11')-H(11M) | 0.9800   |
| C(112)-H(11F) | 0.9800   | C(12')-H(12H) | 0.9800   |
| C(122)-H(12A) | 0.9800   | C(12')-H(12I) | 0.9800   |
| C(122)-H(12B) | 0.9800   | C(12')-H(12J) | 0.9800   |
| C(122)-H(12C) | 0.9800   | C(14)-C(24)   | 1.387(2) |
| C(13)-C(23)   | 1.403(2) | C(14)-C(64)   | 1.393(2) |
| C(13)-C(63)   | 1.407(2) | C(24)-C(34)   | 1.386(2) |
| C(23)-C(33)   | 1.398(2) | C(24)-H(24A)  | 0.9500   |
| C(23)-C(73)   | 1.513(2) | C(34)-C(44)   | 1.377(2) |
| C(33)-C(43)   | 1.373(3) | C(34)-H(34A)  | 0.9500   |
| C(33)-H(33A)  | 0.9500   | C(44)-C(54)   | 1.378(2) |
| C(43)-C(53)   | 1.365(3) | C(44)-H(44A)  | 0.9500   |
| C(43)-H(43A)  | 0.9500   | C(54)-C(64)   | 1.387(2) |
| C(53)-C(63)   | 1.394(2) | C(54)-H(54A)  | 0.9500   |
| C(53)-H(53A)  | 0.9500   | C(64)-H(64A)  | 0.9500   |
| C(63)-C(103)  | 1.518(3) | C(74)-C(124)  | 1.385(2) |
| C(73)-C(93)   | 1.528(3) | C(74)-C(84)   | 1.399(2) |
| C(73)-C(83)   | 1.534(3) | C(84)-C(94)   | 1.390(2) |
| C(73)-H(73A)  | 1.0000   | C(84)-H(84A)  | 0.9500   |
| C(83)-H(83A)  | 0.9800   | C(94)-C(104)  | 1.377(3) |
| C(83)-H(83B)  | 0.9800   | C(94)-H(94A)  | 0.9500   |
| C(83)-H(83C)  | 0.9800   | C(104)-C(114) | 1.376(3) |

|                     |            |                     |            |
|---------------------|------------|---------------------|------------|
| C(104)-H(10C)       | 0.9500     | N(11)-C(21)-C(31)   | 123.86(12) |
| C(114)-C(124)       | 1.397(2)   | N(11)-C(21)-C(11)   | 119.13(12) |
| C(114)-H(11J)       | 0.9500     | C(31)-C(21)-C(11)   | 116.99(11) |
| C(124)-H(12G)       | 0.9500     | C(41)-C(31)-C(21)   | 129.74(12) |
| N(11)-Fe(1)-N(21)   | 97.12(4)   | C(41)-C(31)-H(31A)  | 115.1      |
| N(11)-Fe(1)-B(14)   | 130.16(5)  | C(21)-C(31)-H(31A)  | 115.1      |
| N(21)-Fe(1)-B(14)   | 132.66(5)  | N(21)-C(41)-C(31)   | 123.92(12) |
| N(11)-Fe(1)-H(1B1)  | 132.2(5)   | N(21)-C(41)-C(51)   | 119.79(13) |
| N(21)-Fe(1)-H(1B1)  | 116.5(6)   | C(31)-C(41)-C(51)   | 116.29(12) |
| B(14)-Fe(1)-H(1B1)  | 34.6(5)    | C(41)-C(51)-H(51A)  | 109.5      |
| N(11)-Fe(1)-H(1B2)  | 119.0(6)   | C(41)-C(51)-H(51B)  | 109.5      |
| N(21)-Fe(1)-H(1B2)  | 128.0(6)   | H(51A)-C(51)-H(51B) | 109.5      |
| B(14)-Fe(1)-H(1B2)  | 31.7(5)    | C(41)-C(51)-H(51C)  | 109.5      |
| H(1B1)-Fe(1)-H(1B2) | 66.0(8)    | H(51A)-C(51)-H(51C) | 109.5      |
| C(14)-B(14)-C(74)   | 116.09(11) | H(51B)-C(51)-H(51C) | 109.5      |
| C(14)-B(14)-Fe(1)   | 126.93(10) | C(62)-C(12)-C(22)   | 121.46(12) |
| C(74)-B(14)-Fe(1)   | 116.97(9)  | C(62)-C(12)-N(11)   | 119.52(12) |
| C(14)-B(14)-H(1B1)  | 109.6(7)   | C(22)-C(12)-N(11)   | 118.88(11) |
| C(74)-B(14)-H(1B1)  | 109.9(7)   | C(32)-C(22)-C(12)   | 117.89(14) |
| Fe(1)-B(14)-H(1B1)  | 50.0(7)    | C(32)-C(22)-C(72)   | 119.12(13) |
| C(14)-B(14)-H(1B2)  | 109.9(8)   | C(12)-C(22)-C(72)   | 122.96(12) |
| C(74)-B(14)-H(1B2)  | 111.2(8)   | C(42)-C(32)-C(22)   | 121.30(15) |
| Fe(1)-B(14)-H(1B2)  | 49.1(8)    | C(42)-C(32)-H(32A)  | 119.4      |
| H(1B1)-B(14)-H(1B2) | 98.7(11)   | C(22)-C(32)-H(32A)  | 119.4      |
| C(21)-N(11)-C(12)   | 120.22(11) | C(52)-C(42)-C(32)   | 119.82(14) |
| C(21)-N(11)-Fe(1)   | 121.85(9)  | C(52)-C(42)-H(42A)  | 120.1      |
| C(12)-N(11)-Fe(1)   | 117.87(8)  | C(32)-C(42)-H(42A)  | 120.1      |
| C(41)-N(21)-C(13)   | 119.68(11) | C(42)-C(52)-C(62)   | 121.63(15) |
| C(41)-N(21)-Fe(1)   | 121.48(9)  | C(42)-C(52)-H(52A)  | 119.2      |
| C(13)-N(21)-Fe(1)   | 118.83(8)  | C(62)-C(52)-H(52A)  | 119.2      |
| C(21)-C(11)-H(11A)  | 109.5      | C(52)-C(62)-C(12)   | 117.82(14) |
| C(21)-C(11)-H(11B)  | 109.5      | C(52)-C(62)-C(102)  | 120.20(13) |
| H(11A)-C(11)-H(11B) | 109.5      | C(12)-C(62)-C(102)  | 121.97(12) |
| C(21)-C(11)-H(11C)  | 109.5      | C(22)-C(72)-C(82)   | 111.72(16) |
| H(11A)-C(11)-H(11C) | 109.5      | C(22)-C(72)-C(92)   | 110.82(15) |
| H(11B)-C(11)-H(11C) | 109.5      | C(82)-C(72)-C(92)   | 110.26(16) |

|                      |            |                      |            |
|----------------------|------------|----------------------|------------|
| C(22)-C(72)-H(72A)   | 108.0      | C(33)-C(23)-C(13)    | 117.67(15) |
| C(82)-C(72)-H(72A)   | 108.0      | C(33)-C(23)-C(73)    | 119.95(16) |
| C(92)-C(72)-H(72A)   | 108.0      | C(13)-C(23)-C(73)    | 122.36(14) |
| C(72)-C(82)-H(82A)   | 109.5      | C(43)-C(33)-C(23)    | 121.41(18) |
| C(72)-C(82)-H(82B)   | 109.5      | C(43)-C(33)-H(33A)   | 119.3      |
| H(82A)-C(82)-H(82B)  | 109.5      | C(23)-C(33)-H(33A)   | 119.3      |
| C(72)-C(82)-H(82C)   | 109.5      | C(53)-C(43)-C(33)    | 120.19(17) |
| H(82A)-C(82)-H(82C)  | 109.5      | C(53)-C(43)-H(43A)   | 119.9      |
| H(82B)-C(82)-H(82C)  | 109.5      | C(33)-C(43)-H(43A)   | 119.9      |
| C(72)-C(92)-H(92A)   | 109.5      | C(43)-C(53)-C(63)    | 121.56(17) |
| C(72)-C(92)-H(92B)   | 109.5      | C(43)-C(53)-H(53A)   | 119.2      |
| H(92A)-C(92)-H(92B)  | 109.5      | C(63)-C(53)-H(53A)   | 119.2      |
| C(72)-C(92)-H(92C)   | 109.5      | C(53)-C(63)-C(13)    | 117.78(16) |
| H(92A)-C(92)-H(92C)  | 109.5      | C(53)-C(63)-C(103)   | 120.29(15) |
| H(92B)-C(92)-H(92C)  | 109.5      | C(13)-C(63)-C(103)   | 121.89(14) |
| C(62)-C(102)-C(112)  | 111.04(13) | C(23)-C(73)-C(93)    | 111.56(17) |
| C(62)-C(102)-C(122)  | 112.50(15) | C(23)-C(73)-C(83)    | 111.82(17) |
| C(112)-C(102)-C(122) | 110.68(15) | C(93)-C(73)-C(83)    | 109.88(15) |
| C(62)-C(102)-H(10A)  | 107.5      | C(23)-C(73)-H(73A)   | 107.8      |
| C(112)-C(102)-H(10A) | 107.5      | C(93)-C(73)-H(73A)   | 107.8      |
| C(122)-C(102)-H(10A) | 107.5      | C(83)-C(73)-H(73A)   | 107.8      |
| C(102)-C(112)-H(11D) | 109.5      | C(73)-C(83)-H(83A)   | 109.5      |
| C(102)-C(112)-H(11E) | 109.5      | C(73)-C(83)-H(83B)   | 109.5      |
| H(11D)-C(112)-H(11E) | 109.5      | H(83A)-C(83)-H(83B)  | 109.5      |
| C(102)-C(112)-H(11F) | 109.5      | C(73)-C(83)-H(83C)   | 109.5      |
| H(11D)-C(112)-H(11F) | 109.5      | H(83A)-C(83)-H(83C)  | 109.5      |
| H(11E)-C(112)-H(11F) | 109.5      | H(83B)-C(83)-H(83C)  | 109.5      |
| C(102)-C(122)-H(12A) | 109.5      | C(73)-C(93)-H(93A)   | 109.5      |
| C(102)-C(122)-H(12B) | 109.5      | C(73)-C(93)-H(93B)   | 109.5      |
| H(12A)-C(122)-H(12B) | 109.5      | H(93A)-C(93)-H(93B)  | 109.5      |
| C(102)-C(122)-H(12C) | 109.5      | C(73)-C(93)-H(93C)   | 109.5      |
| H(12A)-C(122)-H(12C) | 109.5      | H(93A)-C(93)-H(93C)  | 109.5      |
| H(12B)-C(122)-H(12C) | 109.5      | H(93B)-C(93)-H(93C)  | 109.5      |
| C(23)-C(13)-C(63)    | 121.38(13) | C(63)-C(103)-C(123)  | 108.5(2)   |
| C(23)-C(13)-N(21)    | 120.23(12) | C(63)-C(103)-C(113)  | 108.5(3)   |
| C(63)-C(13)-N(21)    | 118.22(12) | C(123)-C(103)-C(113) | 109.3(3)   |



|                      |            |                      |            |
|----------------------|------------|----------------------|------------|
| C(63)-C(103)-H(10B)  | 110.1      | C(14)-C(64)-H(64A)   | 118.9      |
| C(123)-C(103)-H(10B) | 110.1      | C(124)-C(74)-C(84)   | 116.31(13) |
| C(113)-C(103)-H(10B) | 110.1      | C(124)-C(74)-B(14)   | 123.73(12) |
| C(24)-C(14)-C(64)    | 115.92(14) | C(84)-C(74)-B(14)    | 119.90(12) |
| C(24)-C(14)-B(14)    | 121.81(13) | C(94)-C(84)-C(74)    | 122.30(15) |
| C(64)-C(14)-B(14)    | 122.23(13) | C(94)-C(84)-H(84A)   | 118.9      |
| C(34)-C(24)-C(14)    | 122.49(15) | C(74)-C(84)-H(84A)   | 118.9      |
| C(34)-C(24)-H(24A)   | 118.8      | C(104)-C(94)-C(84)   | 119.85(15) |
| C(14)-C(24)-H(24A)   | 118.8      | C(104)-C(94)-H(94A)  | 120.1      |
| C(44)-C(34)-C(24)    | 120.23(17) | C(84)-C(94)-H(94A)   | 120.1      |
| C(44)-C(34)-H(34A)   | 119.9      | C(114)-C(104)-C(94)  | 119.34(15) |
| C(24)-C(34)-H(34A)   | 119.9      | C(114)-C(104)-H(10C) | 120.3      |
| C(34)-C(44)-C(54)    | 118.84(16) | C(94)-C(104)-H(10C)  | 120.3      |
| C(34)-C(44)-H(44A)   | 120.6      | C(104)-C(114)-C(124) | 120.36(16) |
| C(54)-C(44)-H(44A)   | 120.6      | C(104)-C(114)-H(11J) | 119.8      |
| C(44)-C(54)-C(64)    | 120.32(15) | C(124)-C(114)-H(11J) | 119.8      |
| C(44)-C(54)-H(54A)   | 119.8      | C(74)-C(124)-C(114)  | 121.83(15) |
| C(64)-C(54)-H(54A)   | 119.8      | C(74)-C(124)-H(12G)  | 119.1      |
| C(54)-C(64)-C(14)    | 122.19(14) | C(114)-C(124)-H(12G) | 119.1      |
| C(54)-C(64)-H(64A)   | 118.9      |                      |            |

---

**L<sup>tBu</sup>Fe(μ-H)<sub>2</sub>BEt<sub>2</sub> (Complex 2c)**

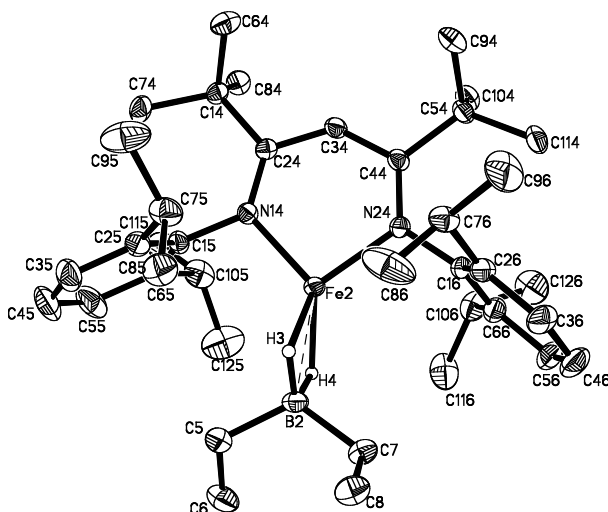

Figure SI.8. ORTEP diagram of the molecular structure of L<sup>tBu</sup>Fe(μ-H)<sub>2</sub>BEt<sub>2</sub>

Table SI.12a. Crystal data and structure refinement for **2c**.

|                           |                                                     |                           |
|---------------------------|-----------------------------------------------------|---------------------------|
| Identification code       | holyy26                                             |                           |
| Empirical formula         | C <sub>39</sub> H <sub>65</sub> B Fe N <sub>2</sub> |                           |
| Formula weight            | 628.59                                              |                           |
| Temperature               | 100.0(1) K                                          |                           |
| Wavelength                | 0.71073 Å                                           |                           |
| Crystal system            | Monoclinic                                          |                           |
| Space group               | <i>P</i> 2 <sub>1</sub> / <i>n</i>                  |                           |
| Unit cell dimensions      | <i>a</i> = 9.8815(15) Å                             | $\alpha = 90^\circ$       |
|                           | <i>b</i> = 19.289(3) Å                              | $\beta = 92.644(2)^\circ$ |
|                           | <i>c</i> = 40.693(6) Å                              | $\gamma = 90^\circ$       |
| Volume                    | 7748(2) Å <sup>3</sup>                              |                           |
| <i>Z</i>                  | 8                                                   |                           |
| Density (calculated)      | 1.078 Mg/m <sup>3</sup>                             |                           |
| Absorption coefficient    | 0.416 mm <sup>-1</sup>                              |                           |
| <i>F</i> (000)            | 2752                                                |                           |
| Crystal color, morphology | dark red, block                                     |                           |
| Crystal size              | 0.48 x 0.28 x 0.12 mm <sup>3</sup>                  |                           |

|                                                     |                                                               |
|-----------------------------------------------------|---------------------------------------------------------------|
| Theta range for data collection                     | 1.84 to 32.03°                                                |
| Index ranges                                        | -14 ≤ <i>h</i> ≤ 14, -28 ≤ <i>k</i> ≤ 28, -60 ≤ <i>l</i> ≤ 60 |
| Reflections collected                               | 136330                                                        |
| Independent reflections                             | 26979 [ <i>R</i> (int) = 0.0342]                              |
| Observed reflections                                | 22036                                                         |
| Completeness to theta = 32.03°                      | 99.9%                                                         |
| Absorption correction                               | Multi-scan                                                    |
| Max. and min. transmission                          | 0.9518 and 0.8255                                             |
| Refinement method                                   | Full-matrix least-squares on <i>F</i> <sup>2</sup>            |
| Data / restraints / parameters                      | 26979 / 0 / 823                                               |
| Goodness-of-fit on <i>F</i> <sup>2</sup>            | 1.033                                                         |
| Final <i>R</i> indices [ <i>I</i> > 2σ( <i>I</i> )] | <i>R</i> 1 = 0.0416, <i>wR</i> 2 = 0.1021                     |
| <i>R</i> indices (all data)                         | <i>R</i> 1 = 0.0545, <i>wR</i> 2 = 0.1086                     |
| Largest diff. peak and hole                         | 0.815 and -0.445 e.Å <sup>-3</sup>                            |

Table SI.12b. Bond lengths [Å] and angles [°] for **2c**.

|             |            |              |            |
|-------------|------------|--------------|------------|
| Fe(1)-N(11) | 1.9691(9)  | C(4)-H(4B)   | 0.9800     |
| Fe(1)-N(21) | 1.9714(9)  | C(4)-H(4C)   | 0.9800     |
| Fe(1)-B(1)  | 2.2323(13) | N(11)-C(21)  | 1.3344(14) |
| Fe(1)-H(1)  | 1.738(16)  | N(11)-C(12)  | 1.4394(14) |
| Fe(1)-H(2)  | 1.732(17)  | N(14)-C(24)  | 1.3328(14) |
| B(1)-C(1)   | 1.6119(18) | N(14)-C(15)  | 1.4306(14) |
| B(1)-C(3)   | 1.6136(18) | N(14)-Fe(2)  | 1.9636(10) |
| B(1)-H(1)   | 1.256(16)  | C(11)-C(81)  | 1.5316(17) |
| B(1)-H(2)   | 1.206(17)  | C(11)-C(71)  | 1.5435(18) |
| C(1)-C(2)   | 1.535(2)   | C(11)-C(61)  | 1.5450(18) |
| C(1)-H(1A)  | 0.9900     | C(11)-C(21)  | 1.5599(15) |
| C(1)-H(1B)  | 0.9900     | C(21)-C(31)  | 1.4091(16) |
| C(2)-H(2A)  | 0.9800     | C(31)-C(41)  | 1.4095(15) |
| C(2)-H(2B)  | 0.9800     | C(31)-H(31)  | 0.9500     |
| C(2)-H(2C)  | 0.9800     | C(41)-N(21)  | 1.3377(14) |
| C(3)-C(4)   | 1.5278(19) | C(41)-C(51)  | 1.5619(15) |
| C(3)-H(3A)  | 0.9900     | C(51)-C(111) | 1.5366(17) |
| C(3)-H(3B)  | 0.9900     | C(51)-C(101) | 1.5460(17) |
| C(4)-H(4A)  | 0.9800     | C(51)-C(91)  | 1.5456(17) |

|               |            |               |            |
|---------------|------------|---------------|------------|
| C(61)-H(61A)  | 0.9800     | C(92)-H(92B)  | 0.9800     |
| C(61)-H(61B)  | 0.9800     | C(92)-H(92C)  | 0.9800     |
| C(61)-H(61C)  | 0.9800     | C(102)-C(122) | 1.533(2)   |
| C(71)-H(71A)  | 0.9800     | C(102)-C(112) | 1.533(2)   |
| C(71)-H(71B)  | 0.9800     | C(102)-H(102) | 1.0000     |
| C(71)-H(71C)  | 0.9800     | C(112)-H(11J) | 0.9800     |
| C(81)-H(81A)  | 0.9800     | C(112)-H(11K) | 0.9800     |
| C(81)-H(81B)  | 0.9800     | C(112)-H(11L) | 0.9800     |
| C(81)-H(81C)  | 0.9800     | C(122)-H(12D) | 0.9800     |
| C(91)-H(91A)  | 0.9800     | C(122)-H(12E) | 0.9800     |
| C(91)-H(91B)  | 0.9800     | C(122)-H(12F) | 0.9800     |
| C(91)-H(91C)  | 0.9800     | C(13)-C(63)   | 1.4127(15) |
| C(101)-H(10A) | 0.9800     | C(13)-C(23)   | 1.4110(15) |
| C(101)-H(10B) | 0.9800     | C(13)-N(21)   | 1.4334(14) |
| C(101)-H(10C) | 0.9800     | C(23)-C(33)   | 1.3951(16) |
| C(111)-H(11A) | 0.9800     | C(23)-C(73)   | 1.5245(16) |
| C(111)-H(11B) | 0.9800     | C(33)-C(43)   | 1.3888(18) |
| C(111)-H(11C) | 0.9800     | C(33)-H(33)   | 0.9500     |
| C(12)-C(22)   | 1.4105(16) | C(43)-C(53)   | 1.3825(19) |
| C(12)-C(62)   | 1.4118(16) | C(43)-H(43)   | 0.9500     |
| C(22)-C(32)   | 1.3997(17) | C(53)-C(63)   | 1.3954(16) |
| C(22)-C(72)   | 1.5213(18) | C(53)-H(53)   | 0.9500     |
| C(32)-C(42)   | 1.386(2)   | C(63)-C(103)  | 1.5249(16) |
| C(32)-H(32)   | 0.9500     | C(73)-C(93)   | 1.5318(17) |
| C(42)-C(52)   | 1.381(2)   | C(73)-C(83)   | 1.5349(19) |
| C(42)-H(42)   | 0.9500     | C(73)-H(18)   | 1.0000     |
| C(52)-C(62)   | 1.3954(19) | C(83)-H(20A)  | 0.9800     |
| C(52)-H(52)   | 0.9500     | C(83)-H(20B)  | 0.9800     |
| C(62)-C(102)  | 1.522(2)   | C(83)-H(20C)  | 0.9800     |
| C(72)-C(92)   | 1.5296(19) | C(93)-H(19A)  | 0.9800     |
| C(72)-C(82)   | 1.5357(18) | C(93)-H(19B)  | 0.9800     |
| C(72)-H(72)   | 1.0000     | C(93)-H(19C)  | 0.9800     |
| C(82)-H(82A)  | 0.9800     | C(103)-C(113) | 1.5336(17) |
| C(82)-H(82B)  | 0.9800     | C(103)-C(123) | 1.5333(17) |
| C(82)-H(82C)  | 0.9800     | C(103)-H(103) | 1.0000     |
| C(92)-H(92A)  | 0.9800     | C(113)-H(11G) | 0.9800     |

|               |            |               |            |
|---------------|------------|---------------|------------|
| C(113)-H(11H) | 0.9800     | C(54)-C(104)  | 1.5421(18) |
| C(113)-H(11I) | 0.9800     | C(54)-C(94)   | 1.5431(18) |
| C(123)-H(12A) | 0.9800     | C(64)-H(64A)  | 0.9800     |
| C(123)-H(12B) | 0.9800     | C(64)-H(64B)  | 0.9800     |
| C(123)-H(12C) | 0.9800     | C(64)-H(64C)  | 0.9800     |
| Fe(2)-N(24)   | 1.9681(10) | C(74)-H(74A)  | 0.9800     |
| Fe(2)-B(2)    | 2.2210(13) | C(74)-H(74B)  | 0.9800     |
| Fe(2)-H(3)    | 1.757(17)  | C(74)-H(74C)  | 0.9800     |
| Fe(2)-H(4)    | 1.756(16)  | C(84)-H(84A)  | 0.9800     |
| B(2)-C(7)     | 1.6089(19) | C(84)-H(84B)  | 0.9800     |
| B(2)-C(5)     | 1.6134(19) | C(84)-H(84C)  | 0.9800     |
| B(2)-H(3)     | 1.232(16)  | C(94)-H(94A)  | 0.9800     |
| B(2)-H(4)     | 1.188(17)  | C(94)-H(94B)  | 0.9800     |
| C(5)-C(6)     | 1.536(2)   | C(94)-H(94C)  | 0.9800     |
| C(5)-H(5A)    | 0.9900     | C(104)-H(10D) | 0.9800     |
| C(5)-H(5B)    | 0.9900     | C(104)-H(10E) | 0.9800     |
| C(6)-H(6A)    | 0.9800     | C(104)-H(10F) | 0.9800     |
| C(6)-H(6B)    | 0.9800     | C(114)-H(11D) | 0.9800     |
| C(6)-H(6C)    | 0.9800     | C(114)-H(11E) | 0.9800     |
| C(7)-C(8)     | 1.5270(18) | C(114)-H(11F) | 0.9800     |
| C(7)-H(7A)    | 0.9900     | C(15)-C(65)   | 1.4045(18) |
| C(7)-H(7B)    | 0.9900     | C(15)-C(25)   | 1.4158(17) |
| C(8)-H(8A)    | 0.9800     | C(25)-C(35)   | 1.3910(19) |
| C(8)-H(8B)    | 0.9800     | C(25)-C(75)   | 1.532(2)   |
| C(8)-H(8C)    | 0.9800     | C(35)-C(45)   | 1.374(3)   |
| N(24)-C(44)   | 1.3376(14) | C(35)-H(35)   | 0.9500     |
| N(24)-C(16)   | 1.4359(14) | C(45)-C(55)   | 1.382(3)   |
| C(14)-C(74)   | 1.5355(17) | C(45)-H(45)   | 0.9500     |
| C(14)-C(84)   | 1.5435(16) | C(55)-C(65)   | 1.4031(19) |
| C(14)-C(64)   | 1.5462(17) | C(55)-H(55)   | 0.9500     |
| C(14)-C(24)   | 1.5589(15) | C(65)-C(105)  | 1.522(2)   |
| C(24)-C(34)   | 1.4097(16) | C(75)-C(85)   | 1.521(2)   |
| C(34)-C(44)   | 1.4088(16) | C(75)-C(95)   | 1.528(2)   |
| C(34)-H(34)   | 0.9500     | C(75)-H(75)   | 1.0000     |
| C(44)-C(54)   | 1.5562(16) | C(85)-H(85A)  | 0.9800     |
| C(54)-C(114)  | 1.5365(18) | C(85)-H(85B)  | 0.9800     |

|               |            |                   |            |
|---------------|------------|-------------------|------------|
| C(85)-H(85C)  | 0.9800     | C(116)-H(11M)     | 0.9800     |
| C(95)-H(95A)  | 0.9800     | C(116)-H(11N)     | 0.9800     |
| C(95)-H(95B)  | 0.9800     | C(116)-H(11O)     | 0.9800     |
| C(95)-H(95C)  | 0.9800     | C(126)-H(12G)     | 0.9800     |
| C(105)-C(115) | 1.535(2)   | C(126)-H(12H)     | 0.9800     |
| C(105)-C(125) | 1.531(2)   | C(126)-H(12I)     | 0.9800     |
| C(105)-H(105) | 1.0000     |                   |            |
| C(115)-H(11P) | 0.9800     | N(11)-Fe(1)-N(21) | 97.35(4)   |
| C(115)-H(11Q) | 0.9800     | N(11)-Fe(1)-B(1)  | 132.27(4)  |
| C(115)-H(11R) | 0.9800     | N(21)-Fe(1)-B(1)  | 130.37(4)  |
| C(125)-H(12J) | 0.9800     | N(11)-Fe(1)-H(1)  | 123.8(5)   |
| C(125)-H(12K) | 0.9800     | N(21)-Fe(1)-H(1)  | 121.7(5)   |
| C(125)-H(12L) | 0.9800     | B(1)-Fe(1)-H(1)   | 34.1(5)    |
| C(16)-C(66)   | 1.4096(17) | N(11)-Fe(1)-H(2)  | 125.4(5)   |
| C(16)-C(26)   | 1.4115(16) | N(21)-Fe(1)-H(2)  | 123.1(5)   |
| C(26)-C(36)   | 1.3968(17) | B(1)-Fe(1)-H(2)   | 32.4(6)    |
| C(26)-C(76)   | 1.5232(18) | H(1)-Fe(1)-H(2)   | 66.5(8)    |
| C(36)-C(46)   | 1.383(2)   | C(1)-B(1)-C(3)    | 117.86(10) |
| C(36)-H(36)   | 0.9500     | C(1)-B(1)-Fe(1)   | 121.58(8)  |
| C(46)-C(56)   | 1.382(2)   | C(3)-B(1)-Fe(1)   | 120.55(8)  |
| C(46)-H(46)   | 0.9500     | C(1)-B(1)-H(1)    | 108.6(7)   |
| C(56)-C(66)   | 1.3975(18) | C(3)-B(1)-H(1)    | 108.6(7)   |
| C(56)-H(56)   | 0.9500     | Fe(1)-B(1)-H(1)   | 50.9(7)    |
| C(66)-C(106)  | 1.5203(18) | C(1)-B(1)-H(2)    | 109.1(8)   |
| C(76)-C(86)   | 1.520(2)   | C(3)-B(1)-H(2)    | 110.1(8)   |
| C(76)-C(96)   | 1.5291(19) | Fe(1)-B(1)-H(2)   | 50.3(8)    |
| C(76)-H(76)   | 1.0000     | H(1)-B(1)-H(2)    | 101.2(11)  |
| C(86)-H(86A)  | 0.9800     | C(2)-C(1)-B(1)    | 113.46(11) |
| C(86)-H(86B)  | 0.9800     | C(2)-C(1)-H(1A)   | 108.9      |
| C(86)-H(86C)  | 0.9800     | B(1)-C(1)-H(1A)   | 108.9      |
| C(96)-H(96A)  | 0.9800     | C(2)-C(1)-H(1B)   | 108.9      |
| C(96)-H(96B)  | 0.9800     | B(1)-C(1)-H(1B)   | 108.9      |
| C(96)-H(96C)  | 0.9800     | H(1A)-C(1)-H(1B)  | 107.7      |
| C(106)-C(126) | 1.532(2)   | C(1)-C(2)-H(2A)   | 109.5      |
| C(106)-C(116) | 1.531(2)   | C(1)-C(2)-H(2B)   | 109.5      |
| C(106)-H(106) | 1.0000     | H(2A)-C(2)-H(2B)  | 109.5      |

|                   |            |                      |            |
|-------------------|------------|----------------------|------------|
| C(1)-C(2)-H(2C)   | 109.5      | C(111)-C(51)-C(101)  | 106.77(10) |
| H(2A)-C(2)-H(2C)  | 109.5      | C(111)-C(51)-C(91)   | 106.21(10) |
| H(2B)-C(2)-H(2C)  | 109.5      | C(101)-C(51)-C(91)   | 109.57(10) |
| C(4)-C(3)-B(1)    | 113.18(11) | C(111)-C(51)-C(41)   | 117.51(9)  |
| C(4)-C(3)-H(3A)   | 108.9      | C(101)-C(51)-C(41)   | 107.55(9)  |
| B(1)-C(3)-H(3A)   | 108.9      | C(91)-C(51)-C(41)    | 109.08(9)  |
| C(4)-C(3)-H(3B)   | 108.9      | C(11)-C(61)-H(61A)   | 109.5      |
| B(1)-C(3)-H(3B)   | 108.9      | C(11)-C(61)-H(61B)   | 109.5      |
| H(3A)-C(3)-H(3B)  | 107.8      | H(61A)-C(61)-H(61B)  | 109.5      |
| C(3)-C(4)-H(4A)   | 109.5      | C(11)-C(61)-H(61C)   | 109.5      |
| C(3)-C(4)-H(4B)   | 109.5      | H(61A)-C(61)-H(61C)  | 109.5      |
| H(4A)-C(4)-H(4B)  | 109.5      | H(61B)-C(61)-H(61C)  | 109.5      |
| C(3)-C(4)-H(4C)   | 109.5      | C(11)-C(71)-H(71A)   | 109.5      |
| H(4A)-C(4)-H(4C)  | 109.5      | C(11)-C(71)-H(71B)   | 109.5      |
| H(4B)-C(4)-H(4C)  | 109.5      | H(71A)-C(71)-H(71B)  | 109.5      |
| C(21)-N(11)-C(12) | 129.28(9)  | C(11)-C(71)-H(71C)   | 109.5      |
| C(21)-N(11)-Fe(1) | 123.13(7)  | H(71A)-C(71)-H(71C)  | 109.5      |
| C(12)-N(11)-Fe(1) | 107.57(7)  | H(71B)-C(71)-H(71C)  | 109.5      |
| C(24)-N(14)-C(15) | 127.60(10) | C(11)-C(81)-H(81A)   | 109.5      |
| C(24)-N(14)-Fe(2) | 123.67(8)  | C(11)-C(81)-H(81B)   | 109.5      |
| C(15)-N(14)-Fe(2) | 108.73(7)  | H(81A)-C(81)-H(81B)  | 109.5      |
| C(81)-C(11)-C(71) | 106.96(10) | C(11)-C(81)-H(81C)   | 109.5      |
| C(81)-C(11)-C(61) | 106.44(10) | H(81A)-C(81)-H(81C)  | 109.5      |
| C(71)-C(11)-C(61) | 109.39(11) | H(81B)-C(81)-H(81C)  | 109.5      |
| C(81)-C(11)-C(21) | 116.67(10) | C(51)-C(91)-H(91A)   | 109.5      |
| C(71)-C(11)-C(21) | 108.19(9)  | C(51)-C(91)-H(91B)   | 109.5      |
| C(61)-C(11)-C(21) | 109.02(10) | H(91A)-C(91)-H(91B)  | 109.5      |
| N(11)-C(21)-C(31) | 121.52(10) | C(51)-C(91)-H(91C)   | 109.5      |
| N(11)-C(21)-C(11) | 125.20(10) | H(91A)-C(91)-H(91C)  | 109.5      |
| C(31)-C(21)-C(11) | 113.28(10) | H(91B)-C(91)-H(91C)  | 109.5      |
| C(21)-C(31)-C(41) | 133.35(10) | C(51)-C(101)-H(10A)  | 109.5      |
| C(21)-C(31)-H(31) | 113.3      | C(51)-C(101)-H(10B)  | 109.5      |
| C(41)-C(31)-H(31) | 113.3      | H(10A)-C(101)-H(10B) | 109.5      |
| N(21)-C(41)-C(31) | 121.04(10) | C(51)-C(101)-H(10C)  | 109.5      |
| N(21)-C(41)-C(51) | 125.45(10) | H(10A)-C(101)-H(10C) | 109.5      |
| C(31)-C(41)-C(51) | 113.50(9)  | H(10B)-C(101)-H(10C) | 109.5      |

|                      |            |                      |            |
|----------------------|------------|----------------------|------------|
| C(51)-C(111)-H(11A)  | 109.5      | C(72)-C(92)-H(92A)   | 109.5      |
| C(51)-C(111)-H(11B)  | 109.5      | C(72)-C(92)-H(92B)   | 109.5      |
| H(11A)-C(111)-H(11B) | 109.5      | H(92A)-C(92)-H(92B)  | 109.5      |
| C(51)-C(111)-H(11C)  | 109.5      | C(72)-C(92)-H(92C)   | 109.5      |
| H(11A)-C(111)-H(11C) | 109.5      | H(92A)-C(92)-H(92C)  | 109.5      |
| H(11B)-C(111)-H(11C) | 109.5      | H(92B)-C(92)-H(92C)  | 109.5      |
| C(22)-C(12)-C(62)    | 121.19(11) | C(62)-C(102)-C(122)  | 111.23(14) |
| C(22)-C(12)-N(11)    | 119.35(10) | C(62)-C(102)-C(112)  | 112.05(13) |
| C(62)-C(12)-N(11)    | 118.91(10) | C(122)-C(102)-C(112) | 109.28(12) |
| C(32)-C(22)-C(12)    | 118.04(12) | C(62)-C(102)-H(102)  | 108.0      |
| C(32)-C(22)-C(72)    | 119.68(11) | C(122)-C(102)-H(102) | 108.0      |
| C(12)-C(22)-C(72)    | 122.28(10) | C(112)-C(102)-H(102) | 108.0      |
| C(42)-C(32)-C(22)    | 121.33(13) | C(102)-C(112)-H(11J) | 109.5      |
| C(42)-C(32)-H(32)    | 119.3      | C(102)-C(112)-H(11K) | 109.5      |
| C(22)-C(32)-H(32)    | 119.3      | H(11J)-C(112)-H(11K) | 109.5      |
| C(52)-C(42)-C(32)    | 119.74(12) | C(102)-C(112)-H(11L) | 109.5      |
| C(52)-C(42)-H(42)    | 120.1      | H(11J)-C(112)-H(11L) | 109.5      |
| C(32)-C(42)-H(42)    | 120.1      | H(11K)-C(112)-H(11L) | 109.5      |
| C(42)-C(52)-C(62)    | 121.58(13) | C(102)-C(122)-H(12D) | 109.5      |
| C(42)-C(52)-H(52)    | 119.2      | C(102)-C(122)-H(12E) | 109.5      |
| C(62)-C(52)-H(52)    | 119.2      | H(12D)-C(122)-H(12E) | 109.5      |
| C(52)-C(62)-C(12)    | 118.10(12) | C(102)-C(122)-H(12F) | 109.5      |
| C(52)-C(62)-C(102)   | 119.70(12) | H(12D)-C(122)-H(12F) | 109.5      |
| C(12)-C(62)-C(102)   | 122.20(11) | H(12E)-C(122)-H(12F) | 109.5      |
| C(22)-C(72)-C(92)    | 111.28(11) | C(63)-C(13)-C(23)    | 121.06(10) |
| C(22)-C(72)-C(82)    | 112.61(12) | C(63)-C(13)-N(21)    | 118.95(9)  |
| C(92)-C(72)-C(82)    | 108.86(11) | C(23)-C(13)-N(21)    | 119.53(9)  |
| C(22)-C(72)-H(72)    | 108.0      | C(33)-C(23)-C(13)    | 118.12(10) |
| C(92)-C(72)-H(72)    | 108.0      | C(33)-C(23)-C(73)    | 119.73(10) |
| C(82)-C(72)-H(72)    | 108.0      | C(13)-C(23)-C(73)    | 122.14(10) |
| C(72)-C(82)-H(82A)   | 109.5      | C(43)-C(33)-C(23)    | 121.34(11) |
| C(72)-C(82)-H(82B)   | 109.5      | C(43)-C(33)-H(33)    | 119.3      |
| H(82A)-C(82)-H(82B)  | 109.5      | C(23)-C(33)-H(33)    | 119.3      |
| C(72)-C(82)-H(82C)   | 109.5      | C(53)-C(43)-C(33)    | 119.86(11) |
| H(82A)-C(82)-H(82C)  | 109.5      | C(53)-C(43)-H(43)    | 120.1      |
| H(82B)-C(82)-H(82C)  | 109.5      | C(33)-C(43)-H(43)    | 120.1      |



|                      |            |                      |            |
|----------------------|------------|----------------------|------------|
| C(43)-C(53)-C(63)    | 121.25(11) | C(103)-C(123)-H(12A) | 109.5      |
| C(43)-C(53)-H(53)    | 119.4      | C(103)-C(123)-H(12B) | 109.5      |
| C(63)-C(53)-H(53)    | 119.4      | H(12A)-C(123)-H(12B) | 109.5      |
| C(53)-C(63)-C(13)    | 118.29(10) | C(103)-C(123)-H(12C) | 109.5      |
| C(53)-C(63)-C(103)   | 119.51(10) | H(12A)-C(123)-H(12C) | 109.5      |
| C(13)-C(63)-C(103)   | 122.20(10) | H(12B)-C(123)-H(12C) | 109.5      |
| C(23)-C(73)-C(93)    | 112.20(10) | N(14)-Fe(2)-N(24)    | 97.47(4)   |
| C(23)-C(73)-C(83)    | 110.81(11) | N(14)-Fe(2)-B(2)     | 129.48(5)  |
| C(93)-C(73)-C(83)    | 109.57(11) | N(24)-Fe(2)-B(2)     | 132.99(5)  |
| C(23)-C(73)-H(18)    | 108.0      | N(14)-Fe(2)-H(3)     | 118.5(5)   |
| C(93)-C(73)-H(18)    | 108.0      | N(24)-Fe(2)-H(3)     | 126.6(5)   |
| C(83)-C(73)-H(18)    | 108.0      | B(2)-Fe(2)-H(3)      | 33.6(5)    |
| C(73)-C(83)-H(20A)   | 109.5      | N(14)-Fe(2)-H(4)     | 124.9(5)   |
| C(73)-C(83)-H(20B)   | 109.5      | N(24)-Fe(2)-H(4)     | 124.5(5)   |
| H(20A)-C(83)-H(20B)  | 109.5      | B(2)-Fe(2)-H(4)      | 32.1(5)    |
| C(73)-C(83)-H(20C)   | 109.5      | H(3)-Fe(2)-H(4)      | 65.7(8)    |
| H(20A)-C(83)-H(20C)  | 109.5      | C(7)-B(2)-C(5)       | 118.21(10) |
| H(20B)-C(83)-H(20C)  | 109.5      | C(7)-B(2)-Fe(2)      | 117.94(9)  |
| C(73)-C(93)-H(19A)   | 109.5      | C(5)-B(2)-Fe(2)      | 123.85(9)  |
| C(73)-C(93)-H(19B)   | 109.5      | C(7)-B(2)-H(3)       | 107.7(8)   |
| H(19A)-C(93)-H(19B)  | 109.5      | C(5)-B(2)-H(3)       | 108.9(8)   |
| C(73)-C(93)-H(19C)   | 109.5      | Fe(2)-B(2)-H(3)      | 52.1(8)    |
| H(19A)-C(93)-H(19C)  | 109.5      | C(7)-B(2)-H(4)       | 107.7(8)   |
| H(19B)-C(93)-H(19C)  | 109.5      | C(5)-B(2)-H(4)       | 109.6(8)   |
| C(63)-C(103)-C(113)  | 111.12(10) | Fe(2)-B(2)-H(4)      | 51.8(8)    |
| C(63)-C(103)-C(123)  | 112.38(10) | H(3)-B(2)-H(4)       | 103.9(11)  |
| C(113)-C(103)-C(123) | 109.61(10) | C(6)-C(5)-B(2)       | 112.51(11) |
| C(63)-C(103)-H(103)  | 107.9      | C(6)-C(5)-H(5A)      | 109.1      |
| C(113)-C(103)-H(103) | 107.9      | B(2)-C(5)-H(5A)      | 109.1      |
| C(123)-C(103)-H(103) | 107.9      | C(6)-C(5)-H(5B)      | 109.1      |
| C(103)-C(113)-H(11G) | 109.5      | B(2)-C(5)-H(5B)      | 109.1      |
| C(103)-C(113)-H(11H) | 109.5      | H(5A)-C(5)-H(5B)     | 107.8      |
| H(11G)-C(113)-H(11H) | 109.5      | C(5)-C(6)-H(6A)      | 109.5      |
| C(103)-C(113)-H(11I) | 109.5      | C(5)-C(6)-H(6B)      | 109.5      |
| H(11G)-C(113)-H(11I) | 109.5      | H(6A)-C(6)-H(6B)     | 109.5      |
| H(11H)-C(113)-H(11I) | 109.5      | C(5)-C(6)-H(6C)      | 109.5      |

|                     |            |                      |            |
|---------------------|------------|----------------------|------------|
| H(6A)-C(6)-H(6C)    | 109.5      | C(114)-C(54)-C(94)   | 106.41(10) |
| H(6B)-C(6)-H(6C)    | 109.5      | C(104)-C(54)-C(94)   | 110.02(10) |
| C(8)-C(7)-B(2)      | 112.03(11) | C(114)-C(54)-C(44)   | 117.83(10) |
| C(8)-C(7)-H(7A)     | 109.2      | C(104)-C(54)-C(44)   | 107.40(9)  |
| B(2)-C(7)-H(7A)     | 109.2      | C(94)-C(54)-C(44)    | 108.58(10) |
| C(8)-C(7)-H(7B)     | 109.2      | C(14)-C(64)-H(64A)   | 109.5      |
| B(2)-C(7)-H(7B)     | 109.2      | C(14)-C(64)-H(64B)   | 109.5      |
| H(7A)-C(7)-H(7B)    | 107.9      | H(64A)-C(64)-H(64B)  | 109.5      |
| C(7)-C(8)-H(8A)     | 109.5      | C(14)-C(64)-H(64C)   | 109.5      |
| C(7)-C(8)-H(8B)     | 109.5      | H(64A)-C(64)-H(64C)  | 109.5      |
| H(8A)-C(8)-H(8B)    | 109.5      | H(64B)-C(64)-H(64C)  | 109.5      |
| C(7)-C(8)-H(8C)     | 109.5      | C(14)-C(74)-H(74A)   | 109.5      |
| H(8A)-C(8)-H(8C)    | 109.5      | C(14)-C(74)-H(74B)   | 109.5      |
| H(8B)-C(8)-H(8C)    | 109.5      | H(74A)-C(74)-H(74B)  | 109.5      |
| C(41)-N(21)-C(13)   | 127.80(9)  | C(14)-C(74)-H(74C)   | 109.5      |
| C(41)-N(21)-Fe(1)   | 123.38(7)  | H(74A)-C(74)-H(74C)  | 109.5      |
| C(13)-N(21)-Fe(1)   | 108.80(7)  | H(74B)-C(74)-H(74C)  | 109.5      |
| C(44)-N(24)-C(16)   | 127.50(9)  | C(14)-C(84)-H(84A)   | 109.5      |
| C(44)-N(24)-Fe(2)   | 122.84(8)  | C(14)-C(84)-H(84B)   | 109.5      |
| C(16)-N(24)-Fe(2)   | 109.65(7)  | H(84A)-C(84)-H(84B)  | 109.5      |
| C(74)-C(14)-C(84)   | 106.77(10) | C(14)-C(84)-H(84C)   | 109.5      |
| C(74)-C(14)-C(64)   | 106.37(10) | H(84A)-C(84)-H(84C)  | 109.5      |
| C(84)-C(14)-C(64)   | 109.25(10) | H(84B)-C(84)-H(84C)  | 109.5      |
| C(74)-C(14)-C(24)   | 117.27(9)  | C(54)-C(94)-H(94A)   | 109.5      |
| C(84)-C(14)-C(24)   | 107.61(9)  | C(54)-C(94)-H(94B)   | 109.5      |
| C(64)-C(14)-C(24)   | 109.37(9)  | H(94A)-C(94)-H(94B)  | 109.5      |
| N(14)-C(24)-C(34)   | 120.97(10) | C(54)-C(94)-H(94C)   | 109.5      |
| N(14)-C(24)-C(14)   | 125.51(10) | H(94A)-C(94)-H(94C)  | 109.5      |
| C(34)-C(24)-C(14)   | 113.52(9)  | H(94B)-C(94)-H(94C)  | 109.5      |
| C(44)-C(34)-C(24)   | 133.22(10) | C(54)-C(104)-H(10D)  | 109.5      |
| C(44)-C(34)-H(34)   | 113.4      | C(54)-C(104)-H(10E)  | 109.5      |
| C(24)-C(34)-H(34)   | 113.4      | H(10D)-C(104)-H(10E) | 109.5      |
| N(24)-C(44)-C(34)   | 121.59(10) | C(54)-C(104)-H(10F)  | 109.5      |
| N(24)-C(44)-C(54)   | 125.30(10) | H(10D)-C(104)-H(10F) | 109.5      |
| C(34)-C(44)-C(54)   | 113.11(10) | H(10E)-C(104)-H(10F) | 109.5      |
| C(114)-C(54)-C(104) | 106.48(11) | C(54)-C(114)-H(11D)  | 109.5      |

|                      |            |                      |            |
|----------------------|------------|----------------------|------------|
| C(54)-C(114)-H(11E)  | 109.5      | C(75)-C(95)-H(95B)   | 109.5      |
| H(11D)-C(114)-H(11E) | 109.5      | H(95A)-C(95)-H(95B)  | 109.5      |
| C(54)-C(114)-H(11F)  | 109.5      | C(75)-C(95)-H(95C)   | 109.5      |
| H(11D)-C(114)-H(11F) | 109.5      | H(95A)-C(95)-H(95C)  | 109.5      |
| H(11E)-C(114)-H(11F) | 109.5      | H(95B)-C(95)-H(95C)  | 109.5      |
| C(65)-C(15)-C(25)    | 122.27(11) | C(65)-C(105)-C(115)  | 113.13(14) |
| C(65)-C(15)-N(14)    | 119.52(11) | C(65)-C(105)-C(125)  | 110.40(13) |
| C(25)-C(15)-N(14)    | 117.90(11) | C(115)-C(105)-C(125) | 109.45(13) |
| C(35)-C(25)-C(15)    | 117.57(13) | C(65)-C(105)-H(105)  | 107.9      |
| C(35)-C(25)-C(75)    | 120.37(13) | C(115)-C(105)-H(105) | 107.9      |
| C(15)-C(25)-C(75)    | 122.06(11) | C(125)-C(105)-H(105) | 107.9      |
| C(45)-C(35)-C(25)    | 121.26(15) | C(105)-C(115)-H(11P) | 109.5      |
| C(45)-C(35)-H(35)    | 119.4      | C(105)-C(115)-H(11Q) | 109.5      |
| C(25)-C(35)-H(35)    | 119.4      | H(11P)-C(115)-H(11Q) | 109.5      |
| C(35)-C(45)-C(55)    | 120.39(14) | C(105)-C(115)-H(11R) | 109.5      |
| C(35)-C(45)-H(45)    | 119.8      | H(11P)-C(115)-H(11R) | 109.5      |
| C(55)-C(45)-H(45)    | 119.8      | H(11Q)-C(115)-H(11R) | 109.5      |
| C(45)-C(55)-C(65)    | 121.52(15) | C(105)-C(125)-H(12J) | 109.5      |
| C(45)-C(55)-H(55)    | 119.2      | C(105)-C(125)-H(12K) | 109.5      |
| C(65)-C(55)-H(55)    | 119.2      | H(12J)-C(125)-H(12K) | 109.5      |
| C(55)-C(65)-C(15)    | 116.84(14) | C(105)-C(125)-H(12L) | 109.5      |
| C(55)-C(65)-C(105)   | 121.07(13) | H(12J)-C(125)-H(12L) | 109.5      |
| C(15)-C(65)-C(105)   | 122.09(11) | H(12K)-C(125)-H(12L) | 109.5      |
| C(85)-C(75)-C(95)    | 109.61(12) | C(66)-C(16)-C(26)    | 121.29(10) |
| C(85)-C(75)-C(25)    | 112.09(12) | C(66)-C(16)-N(24)    | 119.30(10) |
| C(95)-C(75)-C(25)    | 112.69(14) | C(26)-C(16)-N(24)    | 119.02(10) |
| C(85)-C(75)-H(75)    | 107.4      | C(36)-C(26)-C(16)    | 117.90(12) |
| C(95)-C(75)-H(75)    | 107.4      | C(36)-C(26)-C(76)    | 120.55(11) |
| C(25)-C(75)-H(75)    | 107.4      | C(16)-C(26)-C(76)    | 121.55(10) |
| C(75)-C(85)-H(85A)   | 109.5      | C(46)-C(36)-C(26)    | 121.47(13) |
| C(75)-C(85)-H(85B)   | 109.5      | C(46)-C(36)-H(36)    | 119.3      |
| H(85A)-C(85)-H(85B)  | 109.5      | C(26)-C(36)-H(36)    | 119.3      |
| C(75)-C(85)-H(85C)   | 109.5      | C(36)-C(46)-C(56)    | 119.93(12) |
| H(85A)-C(85)-H(85C)  | 109.5      | C(36)-C(46)-H(46)    | 120.0      |
| H(85B)-C(85)-H(85C)  | 109.5      | C(56)-C(46)-H(46)    | 120.0      |
| C(75)-C(95)-H(95A)   | 109.5      | C(46)-C(56)-C(66)    | 121.26(13) |

|                     |            |                      |            |
|---------------------|------------|----------------------|------------|
| C(46)-C(56)-H(56)   | 119.4      | H(96A)-C(96)-H(96C)  | 109.5      |
| C(66)-C(56)-H(56)   | 119.4      | H(96B)-C(96)-H(96C)  | 109.5      |
| C(56)-C(66)-C(16)   | 118.15(12) | C(66)-C(106)-C(126)  | 112.08(12) |
| C(56)-C(66)-C(106)  | 119.87(12) | C(66)-C(106)-C(116)  | 111.33(13) |
| C(16)-C(66)-C(106)  | 121.98(11) | C(126)-C(106)-C(116) | 109.43(12) |
| C(86)-C(76)-C(26)   | 111.48(11) | C(66)-C(106)-H(106)  | 107.9      |
| C(86)-C(76)-C(96)   | 109.85(13) | C(126)-C(106)-H(106) | 107.9      |
| C(26)-C(76)-C(96)   | 112.38(12) | C(116)-C(106)-H(106) | 107.9      |
| C(86)-C(76)-H(76)   | 107.6      | C(106)-C(116)-H(11M) | 109.5      |
| C(26)-C(76)-H(76)   | 107.6      | C(106)-C(116)-H(11N) | 109.5      |
| C(96)-C(76)-H(76)   | 107.6      | H(11M)-C(116)-H(11N) | 109.5      |
| C(76)-C(86)-H(86A)  | 109.5      | C(106)-C(116)-H(11O) | 109.5      |
| C(76)-C(86)-H(86B)  | 109.5      | H(11M)-C(116)-H(11O) | 109.5      |
| H(86A)-C(86)-H(86B) | 109.5      | H(11N)-C(116)-H(11O) | 109.5      |
| C(76)-C(86)-H(86C)  | 109.5      | C(106)-C(126)-H(12G) | 109.5      |
| H(86A)-C(86)-H(86C) | 109.5      | C(106)-C(126)-H(12H) | 109.5      |
| H(86B)-C(86)-H(86C) | 109.5      | H(12G)-C(126)-H(12H) | 109.5      |
| C(76)-C(96)-H(96A)  | 109.5      | C(106)-C(126)-H(12I) | 109.5      |
| C(76)-C(96)-H(96B)  | 109.5      | H(12G)-C(126)-H(12I) | 109.5      |
| H(96A)-C(96)-H(96B) | 109.5      | H(12H)-C(126)-H(12I) | 109.5      |
| C(76)-C(96)-H(96C)  | 109.5      |                      |            |

**L<sup>Me</sup>FePh (Complex 3b)**

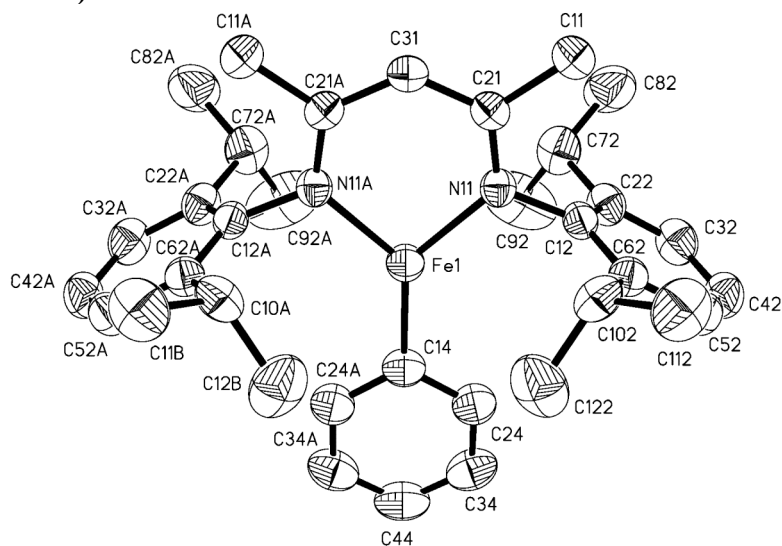

Table SI.13a. Crystal data and structure refinement for **3b**.

|                                 |                                                              |                       |
|---------------------------------|--------------------------------------------------------------|-----------------------|
| Identification code             | holjs76                                                      |                       |
| Empirical formula               | C <sub>35</sub> H <sub>46</sub> Fe N <sub>2</sub>            |                       |
| Formula weight                  | 550.59                                                       |                       |
| Temperature                     | 193(2) K                                                     |                       |
| Wavelength                      | 0.71073 Å                                                    |                       |
| Crystal system                  | Monoclinic                                                   |                       |
| Space group                     | <i>P</i> <sub>2</sub> / <i>1</i> / <i>m</i> 1                |                       |
| Unit cell dimensions            | <i>a</i> = 8.3804(5) Å                                       | $\alpha$ = 90°        |
|                                 | <i>b</i> = 20.8589(12) Å                                     | $\beta$ = 104.136(1)° |
|                                 | <i>c</i> = 9.4280(6) Å                                       | $\gamma$ = 90°        |
| Volume                          | 1598.16(17) Å <sup>3</sup>                                   |                       |
| <i>Z</i>                        | 2                                                            |                       |
| Density (calculated)            | 1.144 Mg/m <sup>3</sup>                                      |                       |
| Absorption coefficient          | 0.496 mm <sup>-1</sup>                                       |                       |
| <i>F</i> (000)                  | 592                                                          |                       |
| Crystal color, morphology       | yellow-green, block                                          |                       |
| Crystal size                    | 0.28 x 0.24 x 0.14 mm <sup>3</sup>                           |                       |
| Theta range for data collection | 2.23 to 26.02°                                               |                       |
| Index ranges                    | -8 ≤ <i>h</i> ≤ 10, -25 ≤ <i>k</i> ≤ 16, -11 ≤ <i>l</i> ≤ 10 |                       |
| Reflections collected           | 8690                                                         |                       |

|                                        |                                       |
|----------------------------------------|---------------------------------------|
| Independent reflections                | 3184 [ $R(\text{int}) = 0.0255$ ]     |
| Observed reflections                   | 2583                                  |
| Completeness to $\theta = 26.02^\circ$ | 98.0%                                 |
| Absorption correction                  | Multi-scan                            |
| Max. and min. transmission             | 0.9339 and 0.8737                     |
| Refinement method                      | Full-matrix least-squares on $F^2$    |
| Data / restraints / parameters         | 3184 / 0 / 183                        |
| Goodness-of-fit on $F^2$               | 1.045                                 |
| Final $R$ indices [ $I > 2\sigma(I)$ ] | $R1 = 0.0367$ , $wR2 = 0.0970$        |
| $R$ indices (all data)                 | $R1 = 0.0488$ , $wR2 = 0.1009$        |
| Largest diff. peak and hole            | 0.328 and -0.255 e. $\text{\AA}^{-3}$ |

Table SI.13b. Bond lengths [Å] and angles [deg] for **3b**.

---

|               |            |
|---------------|------------|
| Fe(1)-N(11)#1 | 1.9724(14) |
| Fe(1)-N(11)   | 1.9724(14) |
| Fe(1)-C(14)   | 2.025(3)   |
| N(11)-C(21)   | 1.336(2)   |
| N(11)-C(12)   | 1.440(2)   |
| C(14)-C(24)#1 | 1.400(2)   |
| C(14)-C(24)   | 1.400(2)   |
| C(24)-C(34)   | 1.388(3)   |
| C(24)-H(24A)  | 0.9500     |
| C(34)-C(44)   | 1.375(3)   |
| C(34)-H(34A)  | 0.9500     |
| C(44)-C(34)#1 | 1.375(3)   |
| C(44)-H(44A)  | 0.9500     |
| C(11)-C(21)   | 1.511(2)   |
| C(11)-H(11A)  | 0.9800     |
| C(11)-H(11B)  | 0.9800     |
| C(11)-H(11C)  | 0.9800     |
| C(21)-C(31)   | 1.399(2)   |
| C(31)-C(21)#1 | 1.399(2)   |
| C(31)-H(31A)  | 0.9500     |
| C(12)-C(62)   | 1.409(2)   |

|                     |            |
|---------------------|------------|
| C(12)-C(22)         | 1.410(2)   |
| C(22)-C(32)         | 1.394(3)   |
| C(22)-C(72)         | 1.526(3)   |
| C(32)-C(42)         | 1.376(3)   |
| C(32)-H(32A)        | 0.9500     |
| C(42)-C(52)         | 1.382(3)   |
| C(42)-H(42A)        | 0.9500     |
| C(52)-C(62)         | 1.394(2)   |
| C(52)-H(52A)        | 0.9500     |
| C(62)-C(102)        | 1.518(2)   |
| C(72)-C(82)         | 1.516(3)   |
| C(72)-C(92)         | 1.534(4)   |
| C(72)-H(72A)        | 1.0000     |
| C(82)-H(82A)        | 0.9800     |
| C(82)-H(82B)        | 0.9800     |
| C(82)-H(82C)        | 0.9800     |
| C(92)-H(92A)        | 0.9800     |
| C(92)-H(92B)        | 0.9800     |
| C(92)-H(92C)        | 0.9800     |
| C(102)-C(122)       | 1.527(3)   |
| C(102)-C(112)       | 1.527(3)   |
| C(102)-H(10A)       | 1.0000     |
| C(112)-H(11D)       | 0.9800     |
| C(112)-H(11E)       | 0.9800     |
| C(112)-H(11F)       | 0.9800     |
| C(122)-H(12A)       | 0.9800     |
| C(122)-H(12B)       | 0.9800     |
| C(122)-H(12C)       | 0.9800     |
| N(11)#1-Fe(1)-N(11) | 92.92(8)   |
| N(11)#1-Fe(1)-C(14) | 133.54(4)  |
| N(11)-Fe(1)-C(14)   | 133.54(4)  |
| C(21)-N(11)-C(12)   | 121.08(14) |
| C(21)-N(11)-Fe(1)   | 126.25(11) |
| C(12)-N(11)-Fe(1)   | 112.67(11) |
| C(24)#1-C(14)-C(24) | 115.4(2)   |
| C(24)#1-C(14)-Fe(1) | 122.29(12) |

|                      |            |
|----------------------|------------|
| C(24)-C(14)-Fe(1)    | 122.29(12) |
| C(34)-C(24)-C(14)    | 122.4(2)   |
| C(34)-C(24)-H(24A)   | 118.8      |
| C(14)-C(24)-H(24A)   | 118.8      |
| C(44)-C(34)-C(24)    | 120.4(2)   |
| C(44)-C(34)-H(34A)   | 119.8      |
| C(24)-C(34)-H(34A)   | 119.8      |
| C(34)#1-C(44)-C(34)  | 119.2(3)   |
| C(34)#1-C(44)-H(44A) | 120.4      |
| C(34)-C(44)-H(44A)   | 120.4      |
| C(21)-C(11)-H(11A)   | 109.5      |
| C(21)-C(11)-H(11B)   | 109.5      |
| H(11A)-C(11)-H(11B)  | 109.5      |
| C(21)-C(11)-H(11C)   | 109.5      |
| H(11A)-C(11)-H(11C)  | 109.5      |
| H(11B)-C(11)-H(11C)  | 109.5      |
| N(11)-C(21)-C(31)    | 123.05(16) |
| N(11)-C(21)-C(11)    | 119.04(15) |
| C(31)-C(21)-C(11)    | 117.91(16) |
| C(21)#1-C(31)-C(21)  | 128.5(2)   |
| C(21)#1-C(31)-H(31A) | 115.8      |
| C(21)-C(31)-H(31A)   | 115.8      |
| C(62)-C(12)-C(22)    | 121.35(16) |
| C(62)-C(12)-N(11)    | 119.42(15) |
| C(22)-C(12)-N(11)    | 118.92(15) |
| C(32)-C(22)-C(12)    | 117.99(17) |
| C(32)-C(22)-C(72)    | 120.32(17) |
| C(12)-C(22)-C(72)    | 121.68(16) |
| C(42)-C(32)-C(22)    | 121.36(18) |
| C(42)-C(32)-H(32A)   | 119.3      |
| C(22)-C(32)-H(32A)   | 119.3      |
| C(32)-C(42)-C(52)    | 120.04(18) |
| C(32)-C(42)-H(42A)   | 120.0      |
| C(52)-C(42)-H(42A)   | 120.0      |
| C(42)-C(52)-C(62)    | 121.40(18) |
| C(42)-C(52)-H(52A)   | 119.3      |



|                      |            |
|----------------------|------------|
| C(62)-C(52)-H(52A)   | 119.3      |
| C(52)-C(62)-C(12)    | 117.85(16) |
| C(52)-C(62)-C(102)   | 121.15(16) |
| C(12)-C(62)-C(102)   | 121.00(15) |
| C(82)-C(72)-C(22)    | 113.04(18) |
| C(82)-C(72)-C(92)    | 109.6(2)   |
| C(22)-C(72)-C(92)    | 110.0(2)   |
| C(82)-C(72)-H(72A)   | 108.0      |
| C(22)-C(72)-H(72A)   | 108.0      |
| C(92)-C(72)-H(72A)   | 108.0      |
| C(72)-C(82)-H(82A)   | 109.5      |
| C(72)-C(82)-H(82B)   | 109.5      |
| H(82A)-C(82)-H(82B)  | 109.5      |
| C(72)-C(82)-H(82C)   | 109.5      |
| H(82A)-C(82)-H(82C)  | 109.5      |
| H(82B)-C(82)-H(82C)  | 109.5      |
| C(72)-C(92)-H(92A)   | 109.5      |
| C(72)-C(92)-H(92B)   | 109.5      |
| H(92A)-C(92)-H(92B)  | 109.5      |
| C(72)-C(92)-H(92C)   | 109.5      |
| H(92A)-C(92)-H(92C)  | 109.5      |
| H(92B)-C(92)-H(92C)  | 109.5      |
| C(62)-C(102)-C(122)  | 110.47(17) |
| C(62)-C(102)-C(112)  | 113.41(17) |
| C(122)-C(102)-C(112) | 109.91(18) |
| C(62)-C(102)-H(10A)  | 107.6      |
| C(122)-C(102)-H(10A) | 107.6      |
| C(112)-C(102)-H(10A) | 107.6      |
| C(102)-C(112)-H(11D) | 109.5      |
| C(102)-C(112)-H(11E) | 109.5      |
| H(11D)-C(112)-H(11E) | 109.5      |
| C(102)-C(112)-H(11F) | 109.5      |
| H(11D)-C(112)-H(11F) | 109.5      |
| H(11E)-C(112)-H(11F) | 109.5      |
| C(102)-C(122)-H(12A) | 109.5      |
| C(102)-C(122)-H(12B) | 109.5      |

|                      |       |
|----------------------|-------|
| H(12A)-C(122)-H(12B) | 109.5 |
| C(102)-C(122)-H(12C) | 109.5 |
| H(12A)-C(122)-H(12C) | 109.5 |
| H(12B)-C(122)-H(12C) | 109.5 |

---

Symmetry transformations used to generate equivalent atoms:

#1  $x, -y+1/2, z$

**L<sup>Me</sup>Fe(H<sub>2</sub>NNH<sub>2</sub>)( $\mu$ -H)<sub>2</sub>BEt<sub>2</sub> (Complex 4).**

Table SI.14a. Crystal data and structure refinement for holyy18.

|                                                     |                                                               |                       |
|-----------------------------------------------------|---------------------------------------------------------------|-----------------------|
| Identification code                                 | holyy18                                                       |                       |
| Empirical formula                                   | C <sub>33</sub> H <sub>57</sub> B Fe N <sub>4</sub>           |                       |
| Formula weight                                      | 576.49                                                        |                       |
| Temperature                                         | 100.0(1) K                                                    |                       |
| Wavelength                                          | 0.71073 Å                                                     |                       |
| Crystal system                                      | Triclinic                                                     |                       |
| Space group                                         | <i>P</i> -1                                                   |                       |
| Unit cell dimensions                                | <i>a</i> = 8.8057(4) Å                                        | $\alpha$ = 73.571(1)° |
|                                                     | <i>b</i> = 11.8380(5) Å                                       | $\beta$ = 76.110(1)°  |
|                                                     | <i>c</i> = 16.5524(8) Å                                       | $\gamma$ = 87.915(1)° |
| Volume                                              | 1605.69(13) Å <sup>3</sup>                                    |                       |
| <i>Z</i>                                            | 2                                                             |                       |
| Density (calculated)                                | 1.192 Mg/m <sup>3</sup>                                       |                       |
| Absorption coefficient                              | 0.497 mm <sup>-1</sup>                                        |                       |
| <i>F</i> (000)                                      | 628                                                           |                       |
| Crystal color, morphology                           | yellow, needle                                                |                       |
| Crystal size                                        | 0.38 x 0.15 x 0.15 mm <sup>3</sup>                            |                       |
| Theta range for data collection                     | 1.90 to 29.57°                                                |                       |
| Index ranges                                        | -12 ≤ <i>h</i> ≤ 12, -16 ≤ <i>k</i> ≤ 16, -22 ≤ <i>l</i> ≤ 22 |                       |
| Reflections collected                               | 19734                                                         |                       |
| Independent reflections                             | 8850 [ <i>R</i> (int) = 0.0301]                               |                       |
| Observed reflections                                | 6912                                                          |                       |
| Completeness to theta = 29.57°                      | 98.2%                                                         |                       |
| Absorption correction                               | Multi-scan                                                    |                       |
| Max. and min. transmission                          | 0.9292 and 0.8336                                             |                       |
| Refinement method                                   | Full-matrix least-squares on <i>F</i> <sup>2</sup>            |                       |
| Data / restraints / parameters                      | 8850 / 0 / 388                                                |                       |
| Goodness-of-fit on <i>F</i> <sup>2</sup>            | 1.024                                                         |                       |
| Final <i>R</i> indices [ <i>I</i> > 2σ( <i>I</i> )] | <i>R</i> 1 = 0.0435, <i>wR</i> 2 = 0.1019                     |                       |
| <i>R</i> indices (all data)                         | <i>R</i> 1 = 0.0643, <i>wR</i> 2 = 0.1098                     |                       |
| Largest diff. peak and hole                         | 1.256 and -0.422 e.Å <sup>-3</sup>                            |                       |

Table SI.14b. Bond lengths [ $\text{\AA}$ ] and angles [ $^\circ$ ] for **4**.

|              |            |               |          |
|--------------|------------|---------------|----------|
| Fe-N(11)     | 2.0075(14) | C(11)-H(11C)  | 0.9800   |
| Fe-N(21)     | 2.0235(14) | C(21)-C(31)   | 1.406(2) |
| Fe-N(15)     | 2.2139(16) | C(31)-C(41)   | 1.409(2) |
| Fe-B         | 2.350(2)   | C(31)-H(31)   | 0.9500   |
| Fe-H(1)      | 1.91(2)    | C(41)-C(51)   | 1.514(2) |
| Fe-H(2)      | 1.82(2)    | C(51)-H(51A)  | 0.9800   |
| B-C(24)      | 1.601(3)   | C(51)-H(51B)  | 0.9800   |
| B-C(34)      | 1.646(3)   | C(51)-H(51C)  | 0.9800   |
| B-H(1)       | 1.22(2)    | C(12)-C(62)   | 1.411(2) |
| B-H(2)       | 1.22(2)    | C(12)-C(22)   | 1.412(2) |
| C(14)-C(24)  | 1.513(3)   | C(22)-C(32)   | 1.398(2) |
| C(14)-H(14A) | 0.9800     | C(22)-C(72)   | 1.519(2) |
| C(14)-H(14B) | 0.9800     | C(32)-C(42)   | 1.380(3) |
| C(14)-H(14C) | 0.9800     | C(32)-H(32)   | 0.9500   |
| C(24)-H(24A) | 0.9900     | C(42)-C(52)   | 1.386(3) |
| C(24)-H(24B) | 0.9900     | C(42)-H(42)   | 0.9500   |
| C(34)-C(44)  | 1.509(3)   | C(52)-C(62)   | 1.395(2) |
| C(34)-H(34A) | 0.9900     | C(52)-H(52)   | 0.9500   |
| C(34)-H(34B) | 0.9900     | C(62)-C(102)  | 1.525(2) |
| C(44)-H(44A) | 0.9800     | C(72)-C(82)   | 1.529(3) |
| C(44)-H(44B) | 0.9800     | C(72)-C(92)   | 1.539(2) |
| C(44)-H(44C) | 0.9800     | C(72)-H(72)   | 1.0000   |
| N(15)-N(25)  | 1.441(2)   | C(82)-H(82A)  | 0.9800   |
| N(15)-H(15A) | 0.88(3)    | C(82)-H(82B)  | 0.9800   |
| N(15)-H(15B) | 0.89(2)    | C(82)-H(82C)  | 0.9800   |
| N(25)-H(25A) | 0.83(3)    | C(92)-H(92A)  | 0.9800   |
| N(25)-H(25B) | 0.79(3)    | C(92)-H(92B)  | 0.9800   |
| N(11)-C(21)  | 1.332(2)   | C(92)-H(92C)  | 0.9800   |
| N(11)-C(12)  | 1.443(2)   | C(102)-C(112) | 1.531(2) |
| N(21)-C(41)  | 1.328(2)   | C(102)-C(122) | 1.536(3) |
| N(21)-C(13)  | 1.441(2)   | C(102)-H(102) | 1.0000   |
| C(11)-C(21)  | 1.515(2)   | C(112)-H(11D) | 0.9800   |
| C(11)-H(11A) | 0.9800     | C(112)-H(11E) | 0.9800   |
| C(11)-H(11B) | 0.9800     | C(112)-H(11F) | 0.9800   |

|                |           |                     |            |
|----------------|-----------|---------------------|------------|
| C(122)-H(12A)  | 0.9800    | N(11)-Fe-B          | 130.35(7)  |
| C(122)-H(12B)  | 0.9800    | N(21)-Fe-B          | 121.38(7)  |
| C(122)-H(12C)  | 0.9800    | N(15)-Fe-B          | 108.57(7)  |
| C(13)-C(23)    | 1.400(2)  | N(11)-Fe-H(1)       | 111.0(7)   |
| C(13)-C(63)    | 1.413(2)  | N(21)-Fe-H(1)       | 105.3(7)   |
| C(23)-C(33)    | 1.400(2)  | N(15)-Fe-H(1)       | 139.5(7)   |
| C(23)-C(73)    | 1.519(2)  | B-Fe-H(1)           | 31.0(7)    |
| C(33)-C(43)    | 1.380(3)  | N(11)-Fe-H(2)       | 130.5(7)   |
| C(33)-H(33)    | 0.9500    | N(21)-Fe-H(2)       | 137.0(7)   |
| C(43)-C(53)    | 1.383(3)  | N(15)-Fe-H(2)       | 79.2(7)    |
| C(43)-H(43)    | 0.9500    | B-Fe-H(2)           | 30.9(7)    |
| C(53)-C(63)    | 1.393(2)  | H(1)-Fe-H(2)        | 61.2(9)    |
| C(53)-H(53)    | 0.9500    | C(24)-B-C(34)       | 115.37(16) |
| C(63)-C(103)   | 1.522(3)  | C(24)-B-Fe          | 133.48(14) |
| C(73)-C(83)    | 1.531(3)  | C(34)-B-Fe          | 110.94(13) |
| C(73)-C(93)    | 1.536(2)  | C(24)-B-H(1)        | 110.1(10)  |
| C(73)-H(73)    | 1.0000    | C(34)-B-H(1)        | 110.9(10)  |
| C(83)-H(83A)   | 0.9800    | Fe-B-H(1)           | 54.3(10)   |
| C(83)-H(83B)   | 0.9800    | C(24)-B-H(2)        | 110.0(10)  |
| C(83)-H(83C)   | 0.9800    | C(34)-B-H(2)        | 106.8(10)  |
| C(93)-H(93A)   | 0.9800    | Fe-B-H(2)           | 50.1(10)   |
| C(93)-H(93B)   | 0.9800    | H(1)-B-H(2)         | 102.9(14)  |
| C(93)-H(93C)   | 0.9800    | C(24)-C(14)-H(14A)  | 109.5      |
| C(103)-C(113)  | 1.518(3)  | C(24)-C(14)-H(14B)  | 109.5      |
| C(103)-C(123)  | 1.518(3)  | H(14A)-C(14)-H(14B) | 109.5      |
| C(103)-H(103)  | 1.0000    | C(24)-C(14)-H(14C)  | 109.5      |
| C(113)-H(11G)  | 0.9800    | H(14A)-C(14)-H(14C) | 109.5      |
| C(113)-H(11H)  | 0.9800    | H(14B)-C(14)-H(14C) | 109.5      |
| C(113)-H(11I)  | 0.9800    | C(14)-C(24)-B       | 116.31(17) |
| C(123)-H(12D)  | 0.9800    | C(14)-C(24)-H(24A)  | 108.2      |
| C(123)-H(12E)  | 0.9800    | B-C(24)-H(24A)      | 108.2      |
| C(123)-H(12F)  | 0.9800    | C(14)-C(24)-H(24B)  | 108.2      |
|                |           | B-C(24)-H(24B)      | 108.2      |
| N(11)-Fe-N(21) | 92.44(6)  | H(24A)-C(24)-H(24B) | 107.4      |
| N(11)-Fe-N(15) | 100.69(6) | C(44)-C(34)-B       | 114.48(18) |
| N(21)-Fe-N(15) | 97.49(6)  | C(44)-C(34)-H(34A)  | 108.6      |

|                     |            |                     |            |
|---------------------|------------|---------------------|------------|
| B-C(34)-H(34A)      | 108.6      | C(41)-C(31)-H(31)   | 115.8      |
| C(44)-C(34)-H(34B)  | 108.6      | N(21)-C(41)-C(31)   | 123.21(15) |
| B-C(34)-H(34B)      | 108.6      | N(21)-C(41)-C(51)   | 120.07(15) |
| H(34A)-C(34)-H(34B) | 107.6      | C(31)-C(41)-C(51)   | 116.73(15) |
| C(34)-C(44)-H(44A)  | 109.5      | C(41)-C(51)-H(51A)  | 109.5      |
| C(34)-C(44)-H(44B)  | 109.5      | C(41)-C(51)-H(51B)  | 109.5      |
| H(44A)-C(44)-H(44B) | 109.5      | H(51A)-C(51)-H(51B) | 109.5      |
| C(34)-C(44)-H(44C)  | 109.5      | C(41)-C(51)-H(51C)  | 109.5      |
| H(44A)-C(44)-H(44C) | 109.5      | H(51A)-C(51)-H(51C) | 109.5      |
| H(44B)-C(44)-H(44C) | 109.5      | H(51B)-C(51)-H(51C) | 109.5      |
| N(25)-N(15)-Fe      | 114.35(13) | C(62)-C(12)-C(22)   | 121.05(15) |
| N(25)-N(15)-H(15A)  | 110.5(17)  | C(62)-C(12)-N(11)   | 118.43(14) |
| Fe-N(15)-H(15A)     | 108.8(17)  | C(22)-C(12)-N(11)   | 120.47(15) |
| N(25)-N(15)-H(15B)  | 107.9(15)  | C(32)-C(22)-C(12)   | 118.25(16) |
| Fe-N(15)-H(15B)     | 109.0(15)  | C(32)-C(22)-C(72)   | 119.50(15) |
| H(15A)-N(15)-H(15B) | 106(2)     | C(12)-C(22)-C(72)   | 122.23(15) |
| N(15)-N(25)-H(25A)  | 110.4(17)  | C(42)-C(32)-C(22)   | 121.18(16) |
| N(15)-N(25)-H(25B)  | 109(2)     | C(42)-C(32)-H(32)   | 119.4      |
| H(25A)-N(25)-H(25B) | 111(3)     | C(22)-C(32)-H(32)   | 119.4      |
| C(21)-N(11)-C(12)   | 118.72(14) | C(32)-C(42)-C(52)   | 120.02(16) |
| C(21)-N(11)-Fe      | 122.44(11) | C(32)-C(42)-H(42)   | 120.0      |
| C(12)-N(11)-Fe      | 118.74(10) | C(52)-C(42)-H(42)   | 120.0      |
| C(41)-N(21)-C(13)   | 119.18(14) | C(42)-C(52)-C(62)   | 121.29(17) |
| C(41)-N(21)-Fe      | 122.94(11) | C(42)-C(52)-H(52)   | 119.4      |
| C(13)-N(21)-Fe      | 117.87(10) | C(62)-C(52)-H(52)   | 119.4      |
| C(21)-C(11)-H(11A)  | 109.5      | C(52)-C(62)-C(12)   | 118.16(16) |
| C(21)-C(11)-H(11B)  | 109.5      | C(52)-C(62)-C(102)  | 121.16(15) |
| H(11A)-C(11)-H(11B) | 109.5      | C(12)-C(62)-C(102)  | 120.67(14) |
| C(21)-C(11)-H(11C)  | 109.5      | C(22)-C(72)-C(82)   | 110.51(14) |
| H(11A)-C(11)-H(11C) | 109.5      | C(22)-C(72)-C(92)   | 111.91(15) |
| H(11B)-C(11)-H(11C) | 109.5      | C(82)-C(72)-C(92)   | 109.41(15) |
| N(11)-C(21)-C(31)   | 123.98(15) | C(22)-C(72)-H(72)   | 108.3      |
| N(11)-C(21)-C(11)   | 119.75(14) | C(82)-C(72)-H(72)   | 108.3      |
| C(31)-C(21)-C(11)   | 116.26(14) | C(92)-C(72)-H(72)   | 108.3      |
| C(21)-C(31)-C(41)   | 128.33(15) | C(72)-C(82)-H(82A)  | 109.5      |
| C(21)-C(31)-H(31)   | 115.8      | C(72)-C(82)-H(82B)  | 109.5      |

|                      |            |                      |            |
|----------------------|------------|----------------------|------------|
| H(82A)-C(82)-H(82B)  | 109.5      | C(23)-C(33)-H(33)    | 119.5      |
| C(72)-C(82)-H(82C)   | 109.5      | C(33)-C(43)-C(53)    | 120.08(16) |
| H(82A)-C(82)-H(82C)  | 109.5      | C(33)-C(43)-H(43)    | 120.0      |
| H(82B)-C(82)-H(82C)  | 109.5      | C(53)-C(43)-H(43)    | 120.0      |
| C(72)-C(92)-H(92A)   | 109.5      | C(43)-C(53)-C(63)    | 121.19(17) |
| C(72)-C(92)-H(92B)   | 109.5      | C(43)-C(53)-H(53)    | 119.4      |
| H(92A)-C(92)-H(92B)  | 109.5      | C(63)-C(53)-H(53)    | 119.4      |
| C(72)-C(92)-H(92C)   | 109.5      | C(53)-C(63)-C(13)    | 118.15(16) |
| H(92A)-C(92)-H(92C)  | 109.5      | C(53)-C(63)-C(103)   | 120.38(16) |
| H(92B)-C(92)-H(92C)  | 109.5      | C(13)-C(63)-C(103)   | 121.47(15) |
| C(62)-C(102)-C(112)  | 113.35(14) | C(23)-C(73)-C(83)    | 110.96(14) |
| C(62)-C(102)-C(122)  | 112.75(14) | C(23)-C(73)-C(93)    | 111.93(14) |
| C(112)-C(102)-C(122) | 108.89(15) | C(83)-C(73)-C(93)    | 109.57(15) |
| C(62)-C(102)-H(102)  | 107.2      | C(23)-C(73)-H(73)    | 108.1      |
| C(112)-C(102)-H(102) | 107.2      | C(83)-C(73)-H(73)    | 108.1      |
| C(122)-C(102)-H(102) | 107.2      | C(93)-C(73)-H(73)    | 108.1      |
| C(102)-C(112)-H(11D) | 109.5      | C(73)-C(83)-H(83A)   | 109.5      |
| C(102)-C(112)-H(11E) | 109.5      | C(73)-C(83)-H(83B)   | 109.5      |
| H(11D)-C(112)-H(11E) | 109.5      | H(83A)-C(83)-H(83B)  | 109.5      |
| C(102)-C(112)-H(11F) | 109.5      | C(73)-C(83)-H(83C)   | 109.5      |
| H(11D)-C(112)-H(11F) | 109.5      | H(83A)-C(83)-H(83C)  | 109.5      |
| H(11E)-C(112)-H(11F) | 109.5      | H(83B)-C(83)-H(83C)  | 109.5      |
| C(102)-C(122)-H(12A) | 109.5      | C(73)-C(93)-H(93A)   | 109.5      |
| C(102)-C(122)-H(12B) | 109.5      | C(73)-C(93)-H(93B)   | 109.5      |
| H(12A)-C(122)-H(12B) | 109.5      | H(93A)-C(93)-H(93B)  | 109.5      |
| C(102)-C(122)-H(12C) | 109.5      | C(73)-C(93)-H(93C)   | 109.5      |
| H(12A)-C(122)-H(12C) | 109.5      | H(93A)-C(93)-H(93C)  | 109.5      |
| H(12B)-C(122)-H(12C) | 109.5      | H(93B)-C(93)-H(93C)  | 109.5      |
| C(23)-C(13)-C(63)    | 121.16(15) | C(113)-C(103)-C(123) | 109.29(17) |
| C(23)-C(13)-N(21)    | 120.97(15) | C(113)-C(103)-C(63)  | 112.88(17) |
| C(63)-C(13)-N(21)    | 117.77(15) | C(123)-C(103)-C(63)  | 111.61(15) |
| C(13)-C(23)-C(33)    | 118.36(16) | C(113)-C(103)-H(103) | 107.6      |
| C(13)-C(23)-C(73)    | 122.48(15) | C(123)-C(103)-H(103) | 107.6      |
| C(33)-C(23)-C(73)    | 119.15(16) | C(63)-C(103)-H(103)  | 107.6      |
| C(43)-C(33)-C(23)    | 121.03(17) | C(103)-C(113)-H(11G) | 109.5      |
| C(43)-C(33)-H(33)    | 119.5      | C(103)-C(113)-H(11H) | 109.5      |

|                      |       |                      |       |
|----------------------|-------|----------------------|-------|
| H(11G)-C(113)-H(11H) | 109.5 | C(103)-C(123)-H(12E) | 109.5 |
| C(103)-C(113)-H(11I) | 109.5 | H(12D)-C(123)-H(12E) | 109.5 |
| H(11G)-C(113)-H(11I) | 109.5 | C(103)-C(123)-H(12F) | 109.5 |
| H(11H)-C(113)-H(11I) | 109.5 | H(12D)-C(123)-H(12F) | 109.5 |
| C(103)-C(123)-H(12D) | 109.5 | H(12E)-C(123)-H(12F) | 109.5 |

---



**L<sup>Me</sup>Fe(μ-NH<sub>2</sub>)<sub>2</sub>BEt<sub>2</sub> (Complex 5).**

Table SI.15a. Crystal data and structure refinement for 5.

---

|                                                     |                                                              |                           |
|-----------------------------------------------------|--------------------------------------------------------------|---------------------------|
| Identification code                                 | holyy15                                                      |                           |
| Empirical formula                                   | C <sub>33</sub> H <sub>55</sub> B Fe N <sub>4</sub>          |                           |
| Formula weight                                      | 574.47                                                       |                           |
| Temperature                                         | 100.0(1) K                                                   |                           |
| Wavelength                                          | 0.71073 Å                                                    |                           |
| Crystal system                                      | Monoclinic                                                   |                           |
| Space group                                         | C2/c                                                         |                           |
| Unit cell dimensions                                | $a = 14.669(2)$ Å                                            | $\alpha = 90^\circ$       |
|                                                     | $b = 11.1121(16)$ Å                                          | $\beta = 90.674(2)^\circ$ |
|                                                     | $c = 20.749(3)$ Å                                            | $\gamma = 90^\circ$       |
| Volume                                              | 3381.9(8) Å <sup>3</sup>                                     |                           |
| Z                                                   | 4                                                            |                           |
| Density (calculated)                                | 1.128 Mg/m <sup>3</sup>                                      |                           |
| Absorption coefficient                              | 0.472 mm <sup>-1</sup>                                       |                           |
| <i>F</i> (000)                                      | 1248                                                         |                           |
| Crystal color, morphology                           | orange, block                                                |                           |
| Crystal size                                        | 0.46 x 0.31 x 0.22 mm <sup>3</sup>                           |                           |
| Theta range for data collection                     | 1.96 to 29.57°                                               |                           |
| Index ranges                                        | $-20 \leq h \leq 20, -15 \leq k \leq 15, -28 \leq l \leq 28$ |                           |
| Reflections collected                               | 23588                                                        |                           |
| Independent reflections                             | 4724 [ <i>R</i> (int) = 0.0209]                              |                           |
| Observed reflections                                | 4251                                                         |                           |
| Completeness to theta = 29.57°                      | 99.5%                                                        |                           |
| Absorption correction                               | Multi-scan                                                   |                           |
| Max. and min. transmission                          | 0.9033 and 0.8122                                            |                           |
| Refinement method                                   | Full-matrix least-squares on <i>F</i> <sup>2</sup>           |                           |
| Data / restraints / parameters                      | 4724 / 3 / 224                                               |                           |
| Goodness-of-fit on <i>F</i> <sup>2</sup>            | 1.051                                                        |                           |
| Final <i>R</i> indices [ <i>I</i> > 2σ( <i>I</i> )] | <i>R</i> 1 = 0.0369, <i>wR</i> 2 = 0.1011                    |                           |
| <i>R</i> indices (all data)                         | <i>R</i> 1 = 0.0418, <i>wR</i> 2 = 0.1050                    |                           |
| Largest diff. peak and hole                         | 0.498 and -0.403 e.Å <sup>-3</sup>                           |                           |

Table SI.15b. Bond lengths [ $\text{\AA}$ ] and angles [ $^\circ$ ] for **5**.

|              |            |               |            |
|--------------|------------|---------------|------------|
| Fe-N(11)     | 1.9925(10) | C(11)-H(11B)  | 0.9800     |
| Fe-N(11)#1   | 1.9925(10) | C(11)-H(11C)  | 0.9800     |
| Fe-N(1)      | 2.0639(15) | C(21)-C(31)   | 1.4092(14) |
| Fe-N(1)#1    | 2.0639(14) | C(31)-C(21)#1 | 1.4092(14) |
| N(1)-B       | 1.509(15)  | C(31)-H(31A)  | 0.9500     |
| N(1)-B#1     | 1.644(13)  | C(12)-C(62)   | 1.4094(17) |
| N(1)-H(1)    | 0.9200     | C(12)-C(22)   | 1.4131(18) |
| N(1)-H(2)    | 0.9200     | C(22)-C(32)   | 1.406(2)   |
| C(2)-C(1)    | 1.534(5)   | C(22)-C(72)   | 1.516(2)   |
| C(2)-H(2A)   | 0.9800     | C(32)-C(42)   | 1.381(3)   |
| C(2)-H(2B)   | 0.9800     | C(32)-H(32A)  | 0.9500     |
| C(2)-H(2C)   | 0.9800     | C(42)-C(52)   | 1.377(3)   |
| C(1)-B       | 1.616(11)  | C(42)-H(42A)  | 0.9500     |
| C(1)-H(1A)   | 0.9900     | C(52)-C(62)   | 1.4011(18) |
| C(1)-H(1B)   | 0.9900     | C(52)-H(52A)  | 0.9500     |
| B-C(3)       | 1.624(16)  | C(62)-C(102)  | 1.522(2)   |
| B-N(1)#1     | 1.644(13)  | C(72)-C(92)   | 1.529(3)   |
| B-C(3')      | 1.68(2)    | C(72)-C(82)   | 1.540(2)   |
| C(3)-C(4)    | 1.518(8)   | C(72)-H(72A)  | 1.0000     |
| C(3)-H(3A)   | 0.9900     | C(82)-H(82A)  | 0.9800     |
| C(3)-H(3B)   | 0.9900     | C(82)-H(82B)  | 0.9800     |
| C(4)-H(4A)   | 0.9800     | C(82)-H(82C)  | 0.9800     |
| C(4)-H(4B)   | 0.9800     | C(92)-H(92A)  | 0.9800     |
| C(4)-H(4C)   | 0.9800     | C(92)-H(92B)  | 0.9800     |
| C(3')-C(4')  | 1.52(2)    | C(92)-H(92C)  | 0.9800     |
| C(3')-H(3C)  | 0.9601     | C(102)-C(122) | 1.512(3)   |
| C(3')-H(3D)  | 0.9600     | C(102)-C(112) | 1.546(6)   |
| C(4')-H(4D)  | 0.9800     | C(102)-H(10A) | 1.0000     |
| C(4')-H(4E)  | 0.9800     | C(112)-H(11D) | 0.9800     |
| C(4')-H(4F)  | 0.9800     | C(112)-H(11E) | 0.9800     |
| N(11)-C(21)  | 1.3329(15) | C(112)-H(11F) | 0.9800     |
| N(11)-C(12)  | 1.4333(14) | C(122)-H(12A) | 0.9800     |
| C(11)-C(21)  | 1.5133(16) | C(122)-H(12B) | 0.9800     |
| C(11)-H(11A) | 0.9800     | C(122)-H(12C) | 0.9800     |

|                   |           |                      |            |
|-------------------|-----------|----------------------|------------|
| C(11')-H(11G)     | 0.9800    | C(4)-C(3)-B          | 112.2(7)   |
| C(11')-H(11H)     | 0.9800    | C(4)-C(3)-H(3A)      | 109.2      |
| C(11')-H(11I)     | 0.9800    | B-C(3)-H(3A)         | 109.2      |
| C(12')-H(12D)     | 0.9800    | C(4)-C(3)-H(3B)      | 109.2      |
| C(12')-H(12E)     | 0.9800    | B-C(3)-H(3B)         | 109.2      |
| C(12')-H(12F)     | 0.9800    | H(3A)-C(3)-H(3B)     | 107.9      |
| N(11)-Fe-N(11)#1  | 93.05(6)  | C(4')-C(3')-B        | 121.0(12)  |
| N(11)-Fe-N(1)     | 125.02(6) | C(4')-C(3')-H(3C)    | 106.9      |
| N(11)#1-Fe-N(1)   | 122.10(5) | B-C(3')-H(3C)        | 106.9      |
| N(11)-Fe-N(1)#1   | 122.10(5) | C(4')-C(3')-H(3D)    | 107.2      |
| N(11)#1-Fe-N(1)#1 | 125.02(6) | B-C(3')-H(3D)        | 107.4      |
| N(1)-Fe-N(1)#1    | 73.12(9)  | H(3C)-C(3')-H(3D)    | 106.8      |
| B-N(1)-Fe         | 93.9(4)   | C(21)-N(11)-C(12)    | 121.80(10) |
| B#1-N(1)-Fe       | 90.0(4)   | C(21)-N(11)-Fe       | 125.90(8)  |
| B-N(1)-H(1)       | 112.9     | C(12)-N(11)-Fe       | 112.23(7)  |
| B#1-N(1)-H(1)     | 123.2     | C(21)-C(11)-H(11A)   | 109.5      |
| Fe-N(1)-H(1)      | 112.9     | C(21)-C(11)-H(11B)   | 109.5      |
| B-N(1)-H(2)       | 112.9     | H(11A)-C(11)-H(11B)  | 109.5      |
| B#1-N(1)-H(2)     | 106.0     | C(21)-C(11)-H(11C)   | 109.5      |
| Fe-N(1)-H(2)      | 112.9     | H(11A)-C(11)-H(11C)  | 109.5      |
| H(1)-N(1)-H(2)    | 110.4     | H(11B)-C(11)-H(11C)  | 109.5      |
| C(2)-C(1)-B       | 116.2(5)  | N(11)-C(21)-C(31)    | 123.13(11) |
| C(2)-C(1)-H(1A)   | 108.2     | N(11)-C(21)-C(11)    | 120.24(10) |
| B-C(1)-H(1A)      | 108.2     | C(31)-C(21)-C(11)    | 116.62(11) |
| C(2)-C(1)-H(1B)   | 108.2     | C(21)#1-C(31)-C(21)  | 128.79(16) |
| B-C(1)-H(1B)      | 108.2     | C(21)#1-C(31)-H(31A) | 115.6      |
| H(1A)-C(1)-H(1B)  | 107.4     | C(21)-C(31)-H(31A)   | 115.6      |
| N(1)-B-C(1)       | 113.6(11) | C(62)-C(12)-C(22)    | 120.72(12) |
| N(1)-B-C(3)       | 98.5(9)   | C(62)-C(12)-N(11)    | 120.04(11) |
| C(1)-B-C(3)       | 117.0(4)  | C(22)-C(12)-N(11)    | 118.93(11) |
| N(1)-B-N(1)#1     | 102.5(3)  | C(32)-C(22)-C(12)    | 117.94(14) |
| C(1)-B-N(1)#1     | 112.8(9)  | C(32)-C(22)-C(72)    | 121.36(14) |
| C(3)-B-N(1)#1     | 110.7(9)  | C(12)-C(22)-C(72)    | 120.69(13) |
| N(1)-B-C(3')      | 119.9(11) | C(42)-C(32)-C(22)    | 121.57(15) |
| C(1)-B-C(3')      | 108.2(7)  | C(42)-C(32)-H(32A)   | 119.2      |
| N(1)#1-B-C(3')    | 98.8(10)  | C(22)-C(32)-H(32A)   | 119.2      |

|                    |            |                      |          |
|--------------------|------------|----------------------|----------|
| C(52)-C(42)-C(32)  | 119.82(14) | H(82A)-C(82)-H(82B)  | 109.5    |
| C(52)-C(42)-H(42A) | 120.1      | C(72)-C(82)-H(82C)   | 109.5    |
| C(32)-C(42)-H(42A) | 120.1      | H(82A)-C(82)-H(82C)  | 109.5    |
| C(42)-C(52)-C(62)  | 121.31(15) | H(82B)-C(82)-H(82C)  | 109.5    |
| C(42)-C(52)-H(52A) | 119.3      | C(72)-C(92)-H(92A)   | 109.5    |
| C(62)-C(52)-H(52A) | 119.3      | C(72)-C(92)-H(92B)   | 109.5    |
| C(52)-C(62)-C(12)  | 118.63(13) | H(92A)-C(92)-H(92B)  | 109.5    |
| C(52)-C(62)-C(102) | 119.13(13) | C(72)-C(92)-H(92C)   | 109.5    |
| C(12)-C(62)-C(102) | 122.24(11) | H(92A)-C(92)-H(92C)  | 109.5    |
| C(22)-C(72)-C(92)  | 110.46(15) | H(92B)-C(92)-H(92C)  | 109.5    |
| C(22)-C(72)-C(82)  | 113.11(15) | C(122)-C(102)-C(62)  | 116.9(2) |
| C(92)-C(72)-C(82)  | 109.52(15) | C(122)-C(102)-C(112) | 109.8(4) |
| C(22)-C(72)-H(72A) | 107.9      | C(62)-C(102)-C(112)  | 112.9(4) |
| C(92)-C(72)-H(72A) | 107.9      | C(122)-C(102)-H(10A) | 105.4    |
| C(82)-C(72)-H(72A) | 107.9      | C(62)-C(102)-H(10A)  | 105.4    |
| C(72)-C(82)-H(82A) | 109.5      | C(112)-C(102)-H(10A) | 105.4    |
| C(72)-C(82)-H(82B) | 109.5      |                      |          |

---

Symmetry transformations used to generate equivalent atoms:

#1 -x,y,-z+3/2
